# Supplementary material for: Inversions maintain differences between migratory phenotypes of a songbird
Source: Springer Nature journal article supplement (doi:10.1038/s41467-023-36167-y), 2023-01-27
Supplement: MOESM1 [file 41467_2023_36167_MOESM1_ESM.pdf]

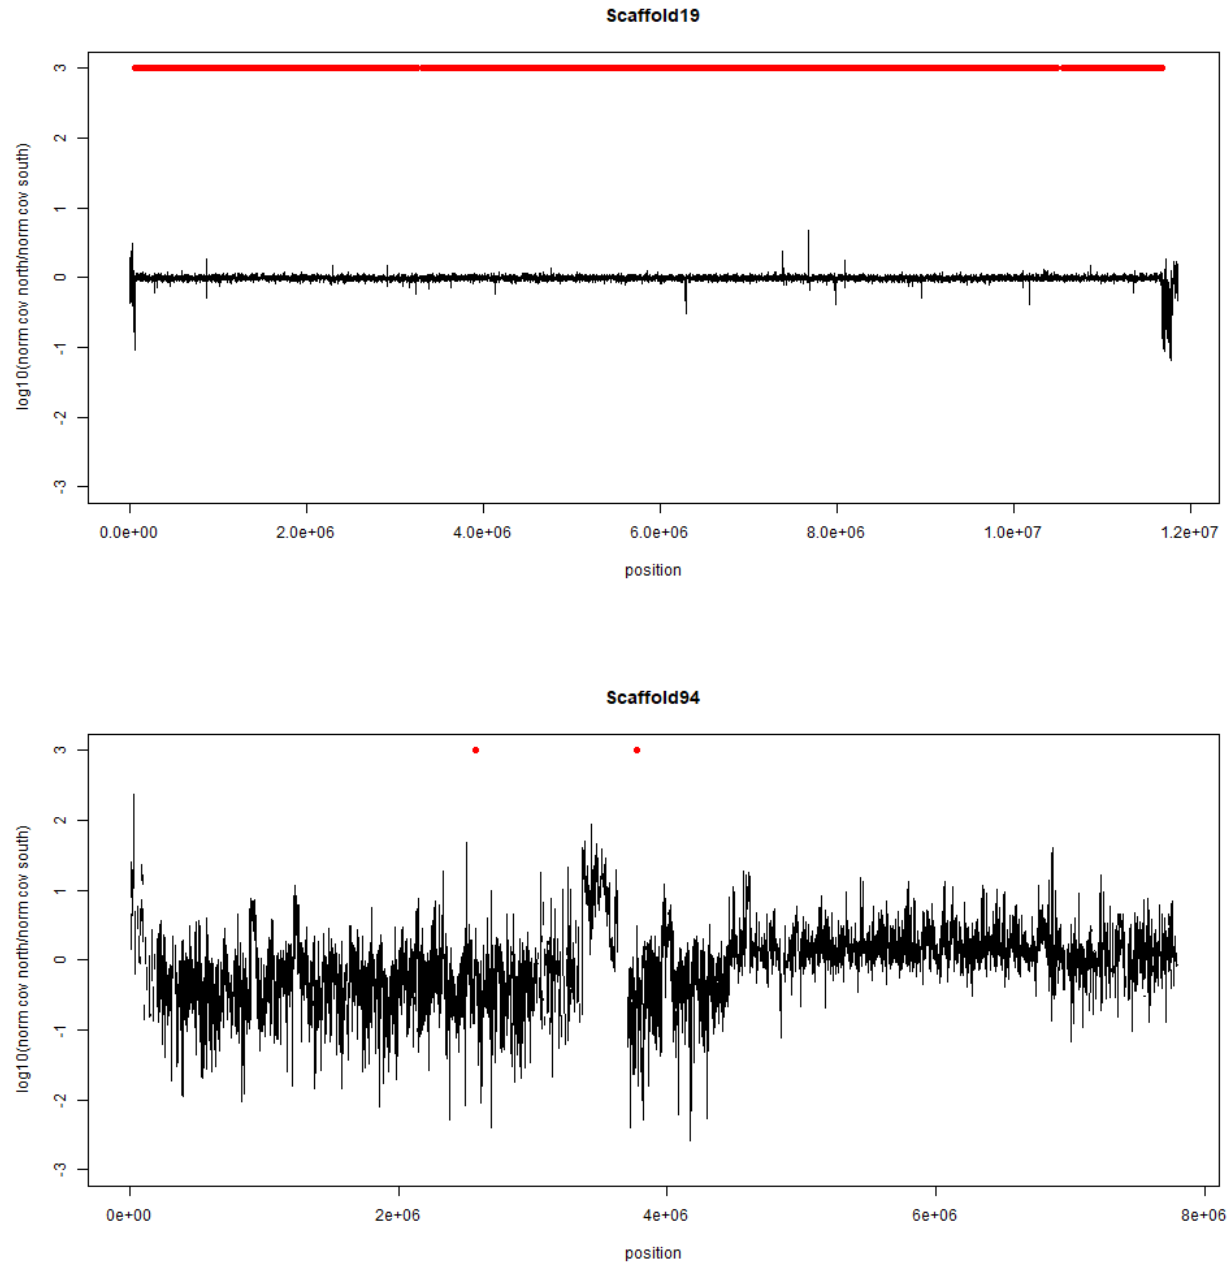

**Supplementary Figure 1.** Difference in mean normalized coverage ( $\log_{10}(\text{norm cov}_{\text{north}}/\text{norm cov}_{\text{south}})$ ) between 11 northern and 11 southern resequenced willow warblers for two scaffolds in the southern assembly. Scaffold19 contains the divergent region on chromosome 1. Scaffold94 is a repeat-rich scaffold that contains highly differentiated variants between the willow warbler subspecies, but it has not been assigned to a specific chromosome. Coverage has been calculated in non-overlapping windows of 1 kb and only for properly paired reads with a minimum mapping quality of 1. Red points refer to positions with highly differentiated ( $F_{ST} \geq 0.7$ ) variants.

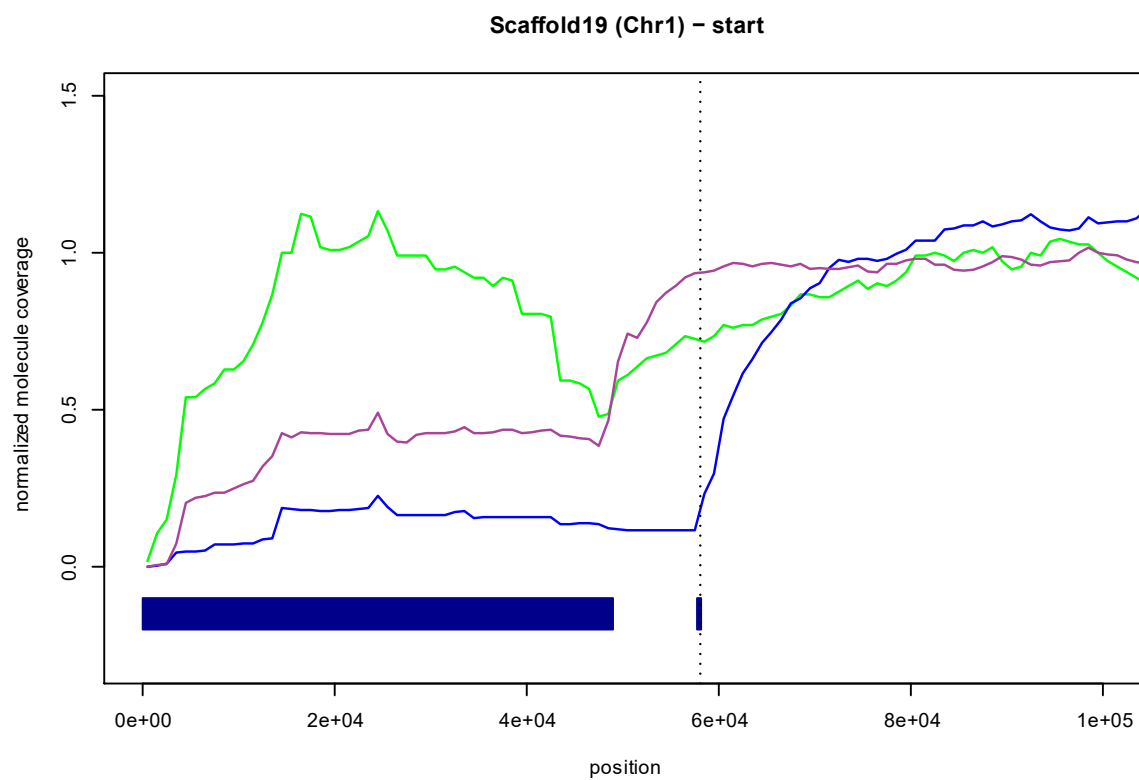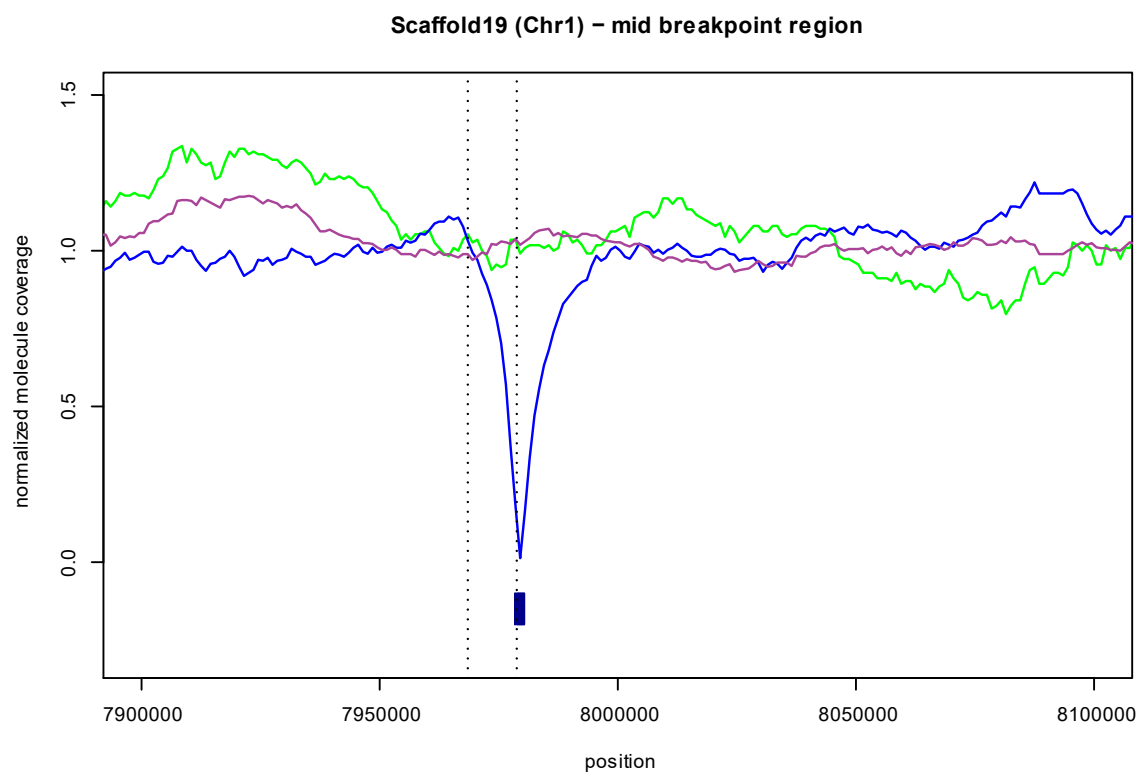

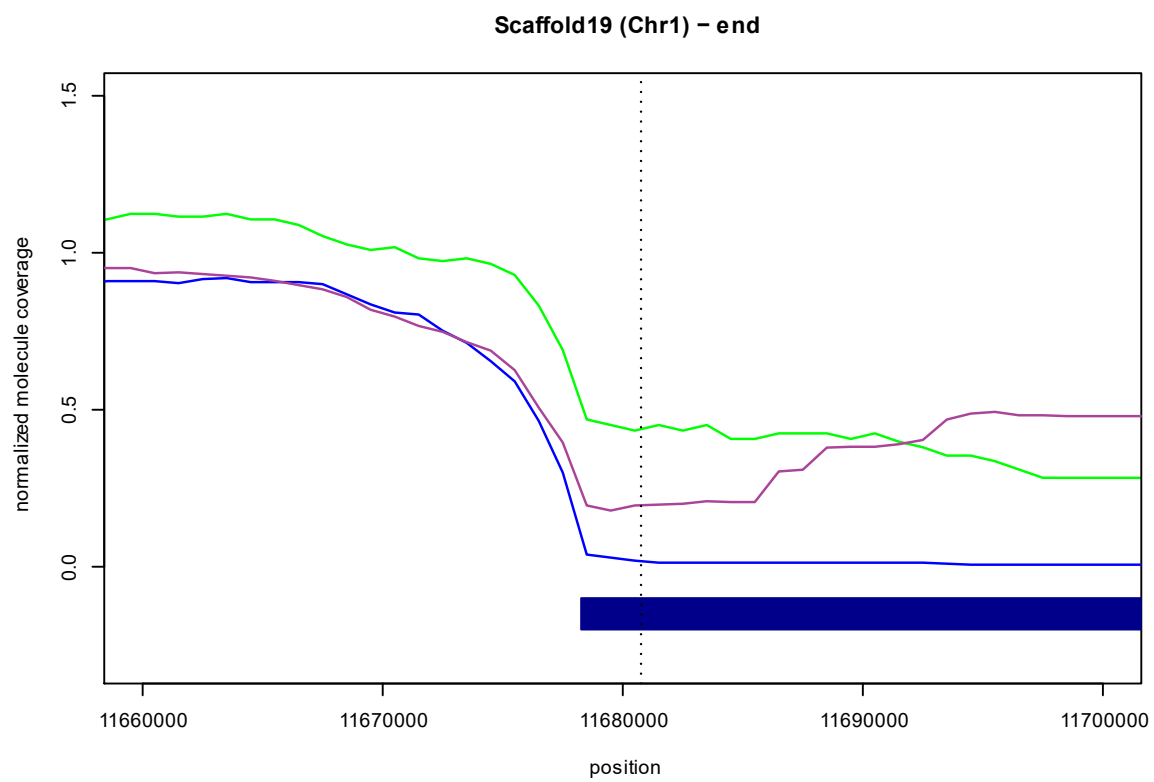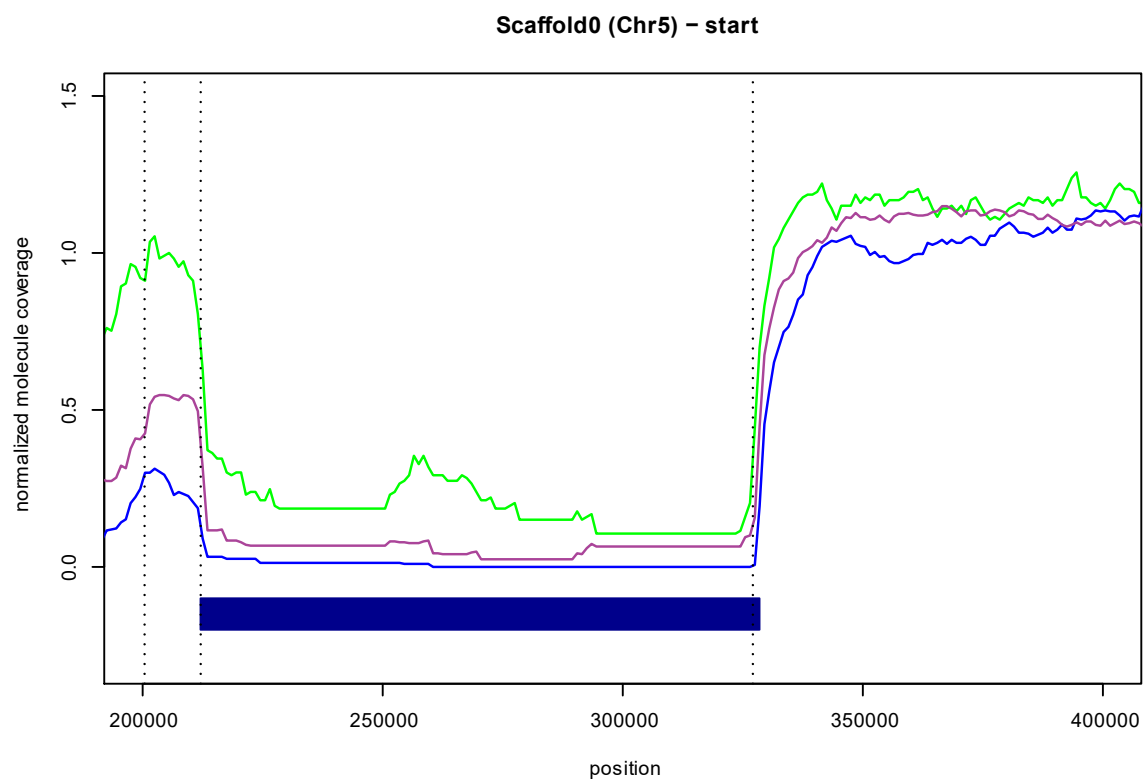

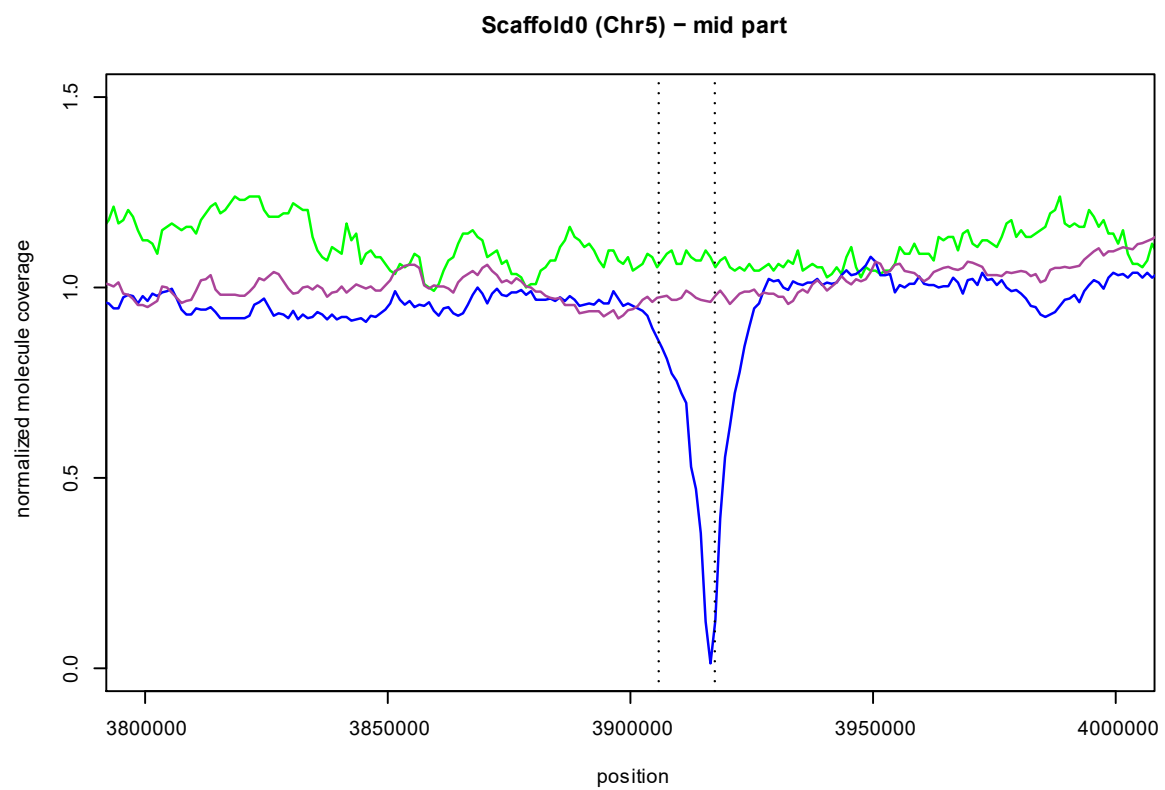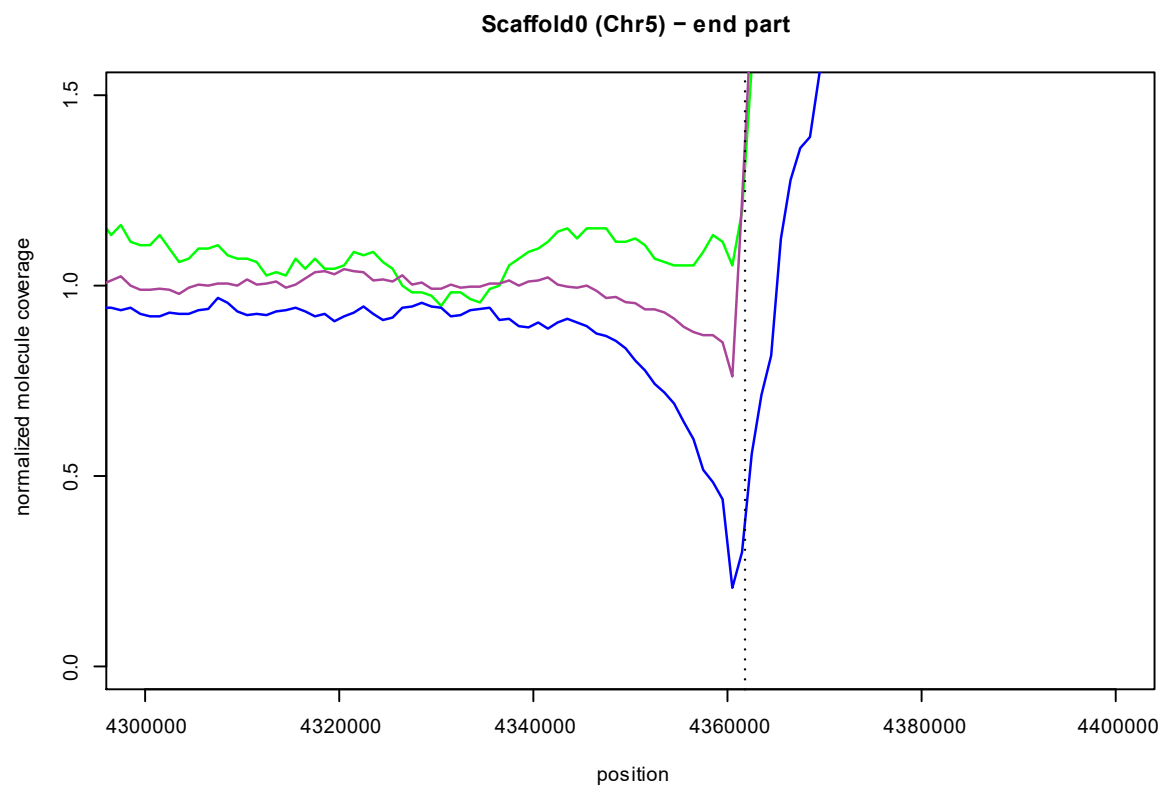

**Supplementary Figure 2.** Normalized 10x chromium molecule coverage in breakpoint regions in the divergent regions on chromosomes 1 and 5 in the southern willow warbler assembly. Green represents coverage for the southern willow warbler sample, blue the northern willow warbler sample and magenta the additional willow warbler sample that is homozygous southern for the divergent regions on chromosome 1 and 5. Normalized molecule coverage refers to the number of 10x chromium barcodes (molecules) present in non-overlapping 1 kb windows, which has been normalized by the median 1 kb molecule coverage for the sample in each of the divergent regions. Only barcodes associated with molecules that are at least 10 kb have been included. Dotted lines refer to the endpoints of the alignments of scaffolds from the assembly of the other northern sample. Dark blue boxes represent intervals containing tandem repeat arrays.

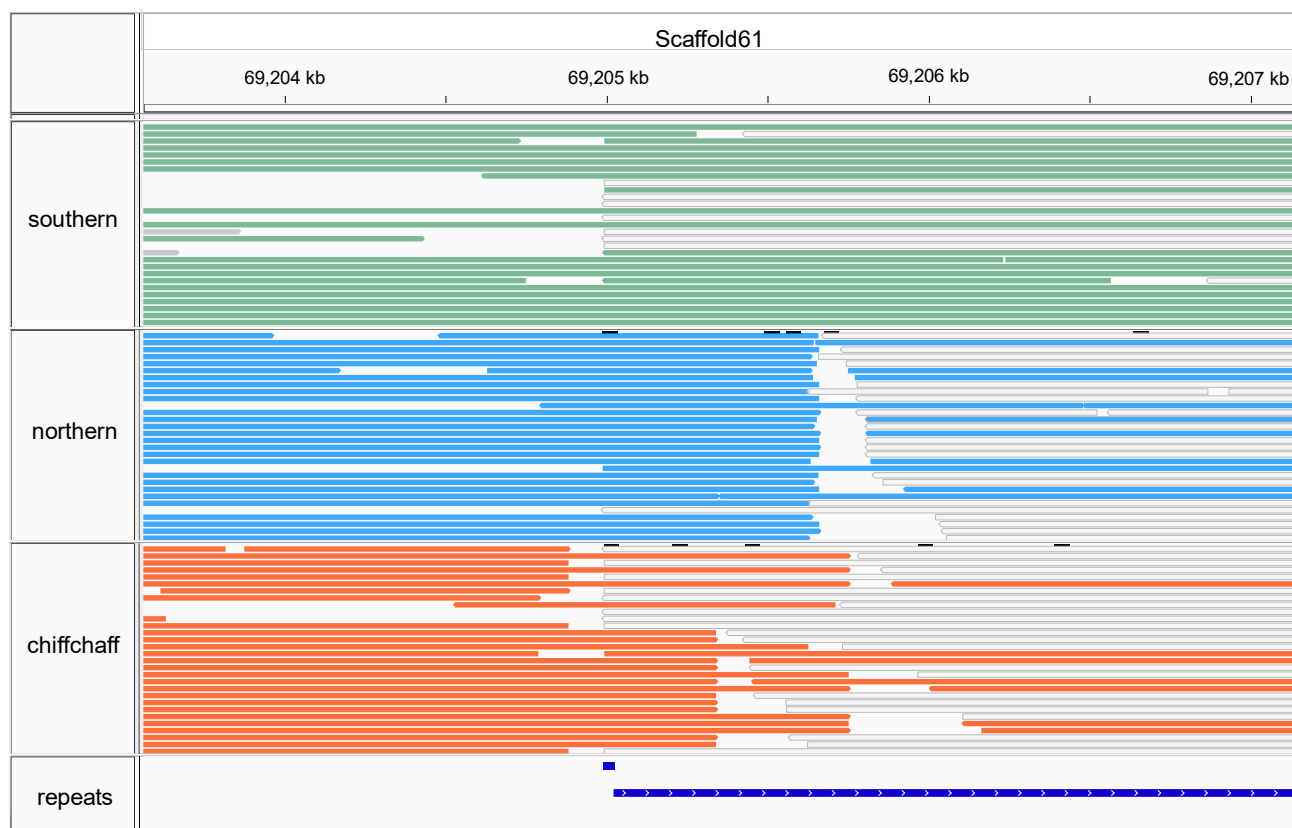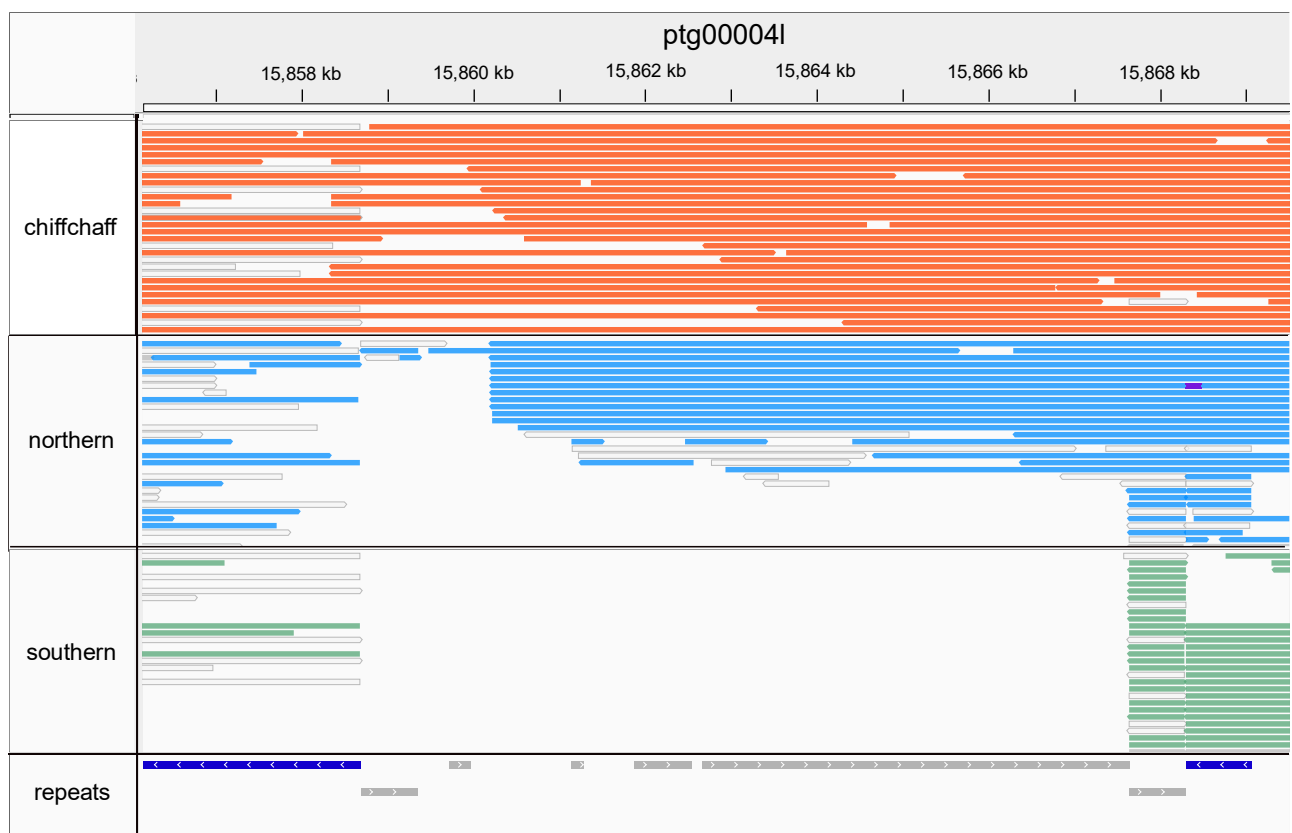

**Supplementary Figure 3.** Long read data from the southern willow warbler (green), northern willow warbler (blue) and chiffchaff (orange) mapped to the start of the divergent region on chromosome 3 in the southern willow warbler assembly (Scaffold61) and in the chiffchaff assembly (Contig ptg000040l). Reads with a white filling have a mapping quality of zero and tandem repeat intervals have been highlighted in dark blue. In the southern assembly, northern willow warbler and chiffchaff reads could not be properly aligned beyond the start of the tandem repeat array. In the chiffchaff assembly, the southern willow warbler reads could not be aligned in between the ~9.7 kb interval containing mostly LTR/ERV1 repeats between two tandem repeat arrays. In contrast, northern willow warbler reads could be aligned through most of the region, except for the interval just before the first tandem repeat array.

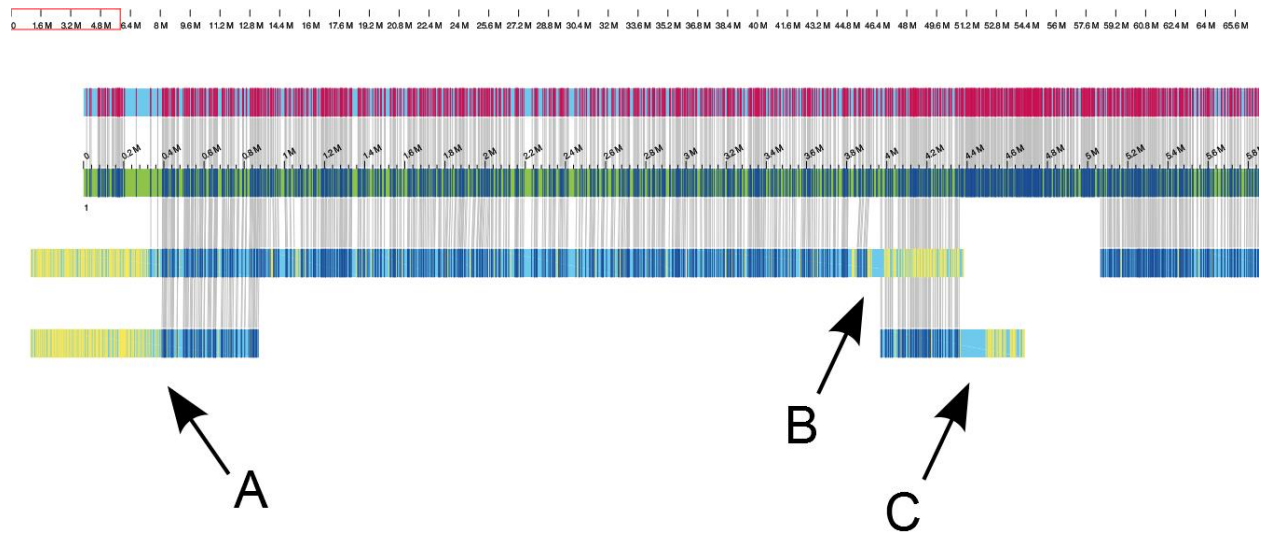

**Supplementary Figure 4.** Hybrid assembly between the northern optical map and the southern assembly for the divergent region on chromosome 5 (Scaffold0) where no cuts supported by the optical map have been allowed. The upper blue segment represents the optical map of the southern assembly (blue), the green segment the hybrid assembly between the northern assembly and the southern optical map and the blue segments at the bottom, the optical map (contigs) of the northern sample. Matching nicking sites between the northern optical map and the southern genome are connected with vertical lines and highlighted with black bars in each contig. Yellow bars within contigs represent unmatched nicking sites. A) The first breakpoint region with no match before 335 kb. The non-matching part has a nicking site pattern that is reminiscent of that found upstream of the divergent region, around 4.3 Mb. B) Second breakpoint region at around 3910 kb, where the shift occurs between inverted and collinear segments. C) Second collinear interval (3970 kb-4361 kb), with a different optical map contig compared to B), which has been aligned in the reverse orientation but shows the same structural difference to the southern assembly. Both contigs contain a large interval with no nicking sites, which is predicted to correspond to interval around A) in the southern assembly.



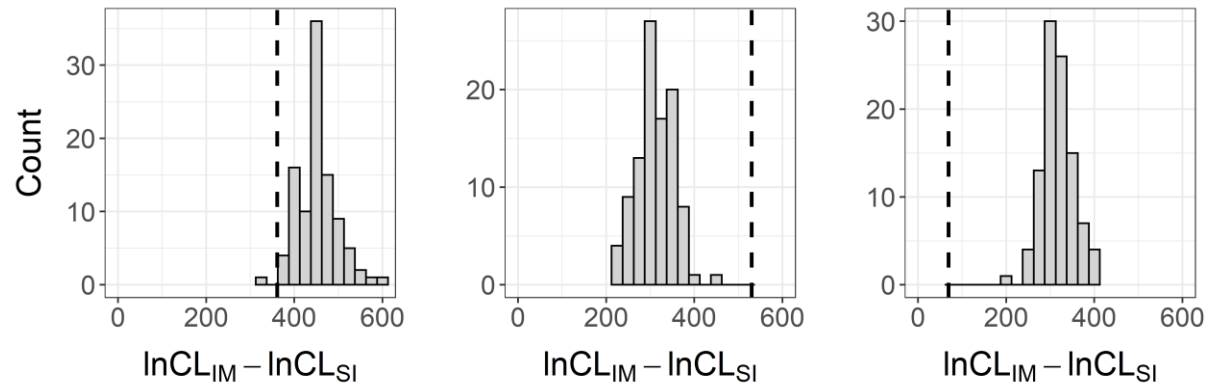

**Supplementary Figure 5.** Histograms of improvement in composite likelihood (CL) when optimizing 100 simulated strict isolation (SI) datasets under an isolation with migration (IM) model rather than SI. Plots, left to right, are for the chromosome 1, 3, and 5 regions respectively. The dashed lines represent the improvement in the real data, showing that only the chromosome 3 region has an improvement in CL which is greater than expected when there is no migration.

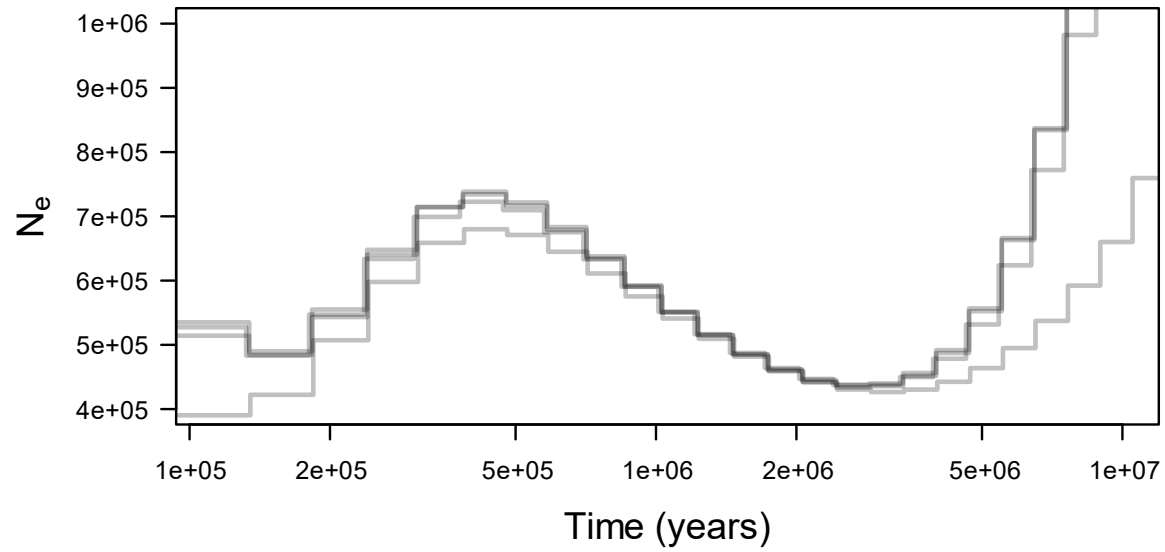

**Supplementary Figure 6.** Estimates of genome-wide  $N_e$  over time inferred from MSMC2 for four high-coverage willow warbler samples. For this analysis, intervals overlapping the divergent regions as well as scaffold shorter than 500 kb have been excluded. Time, between 100KYA and 10MYA, is plotted on a log10 axis.

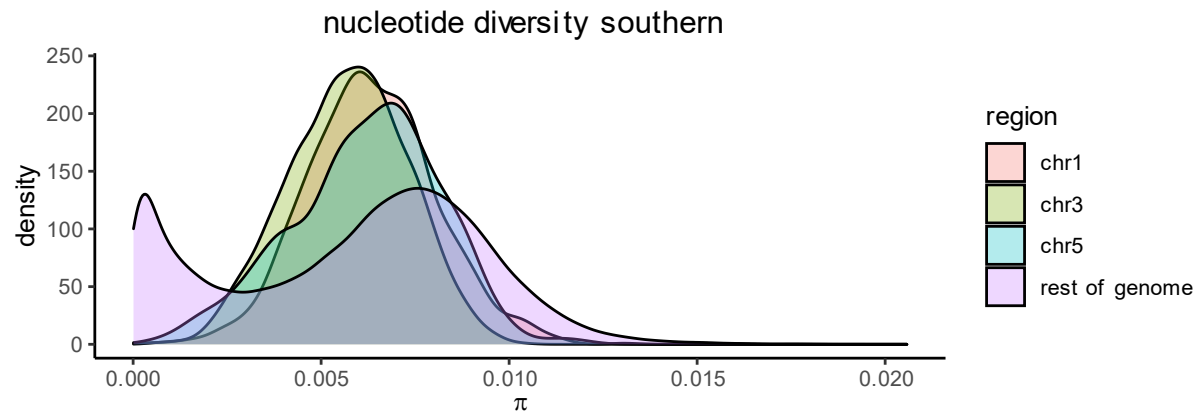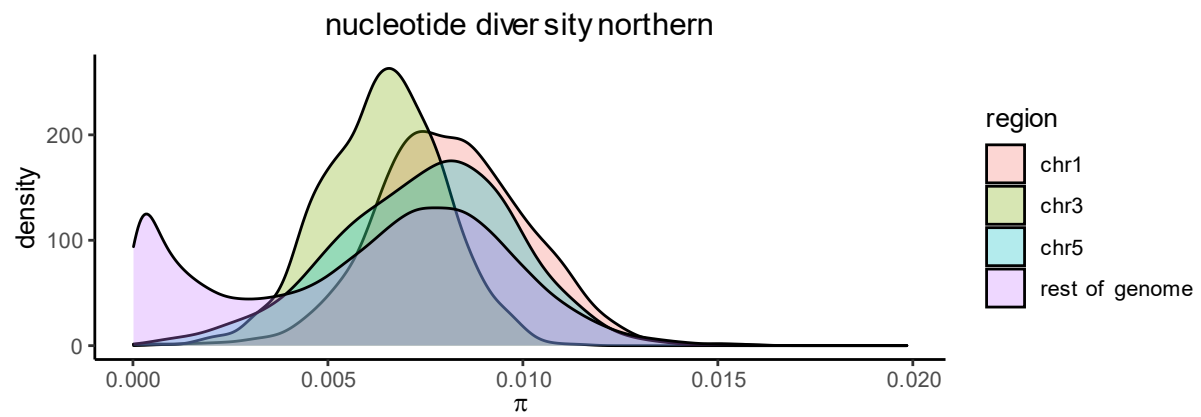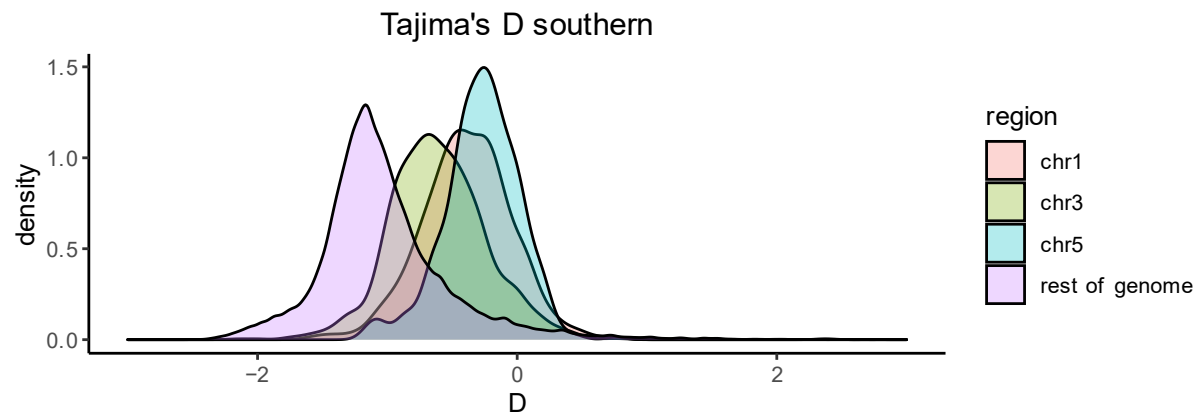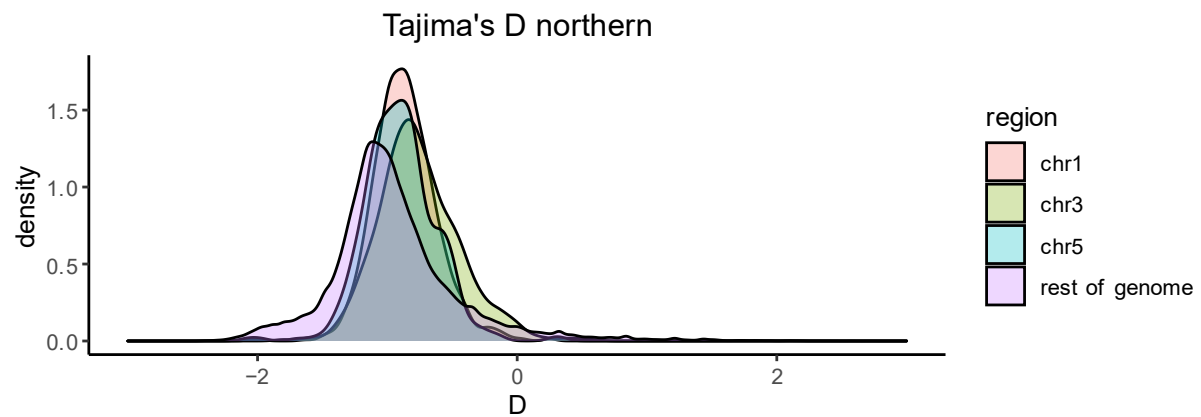

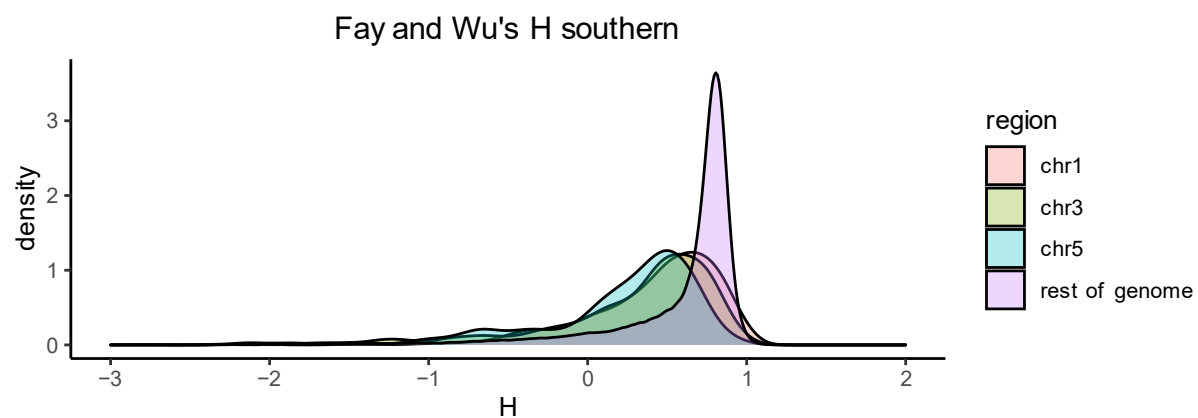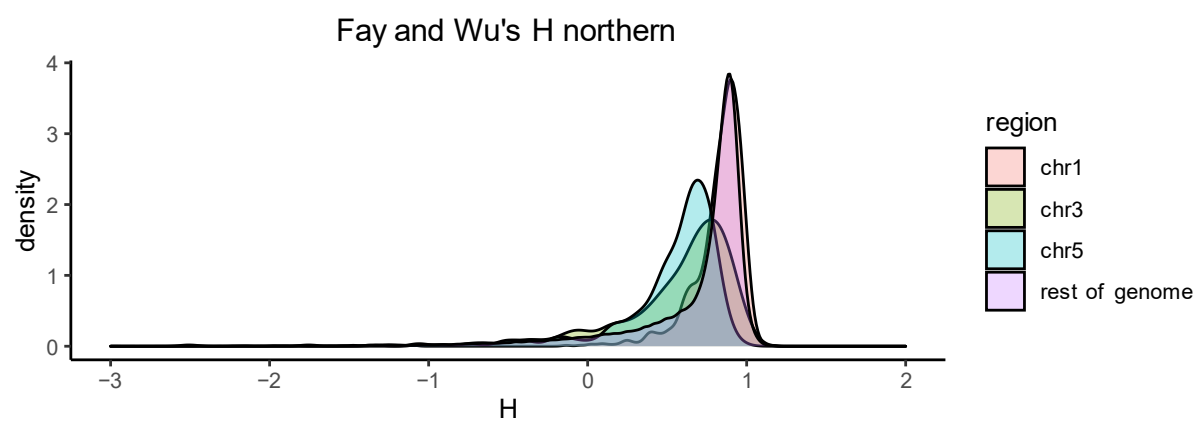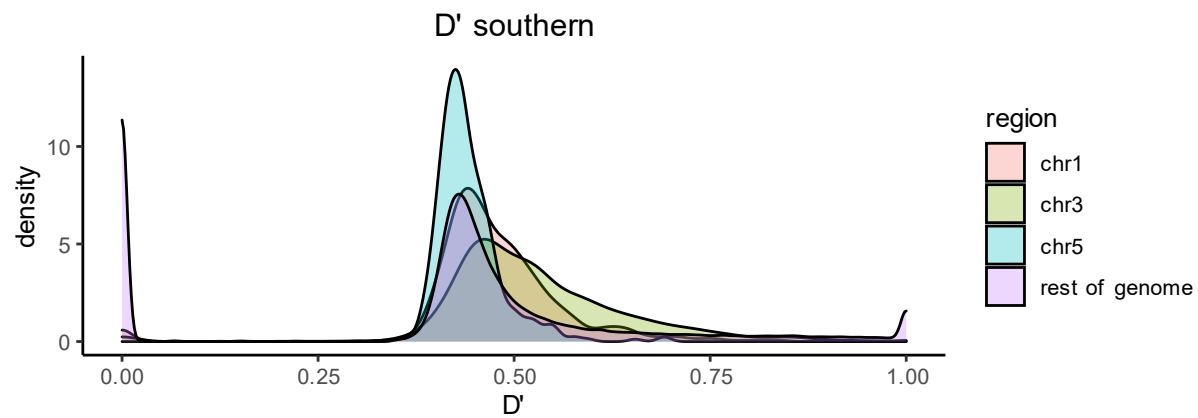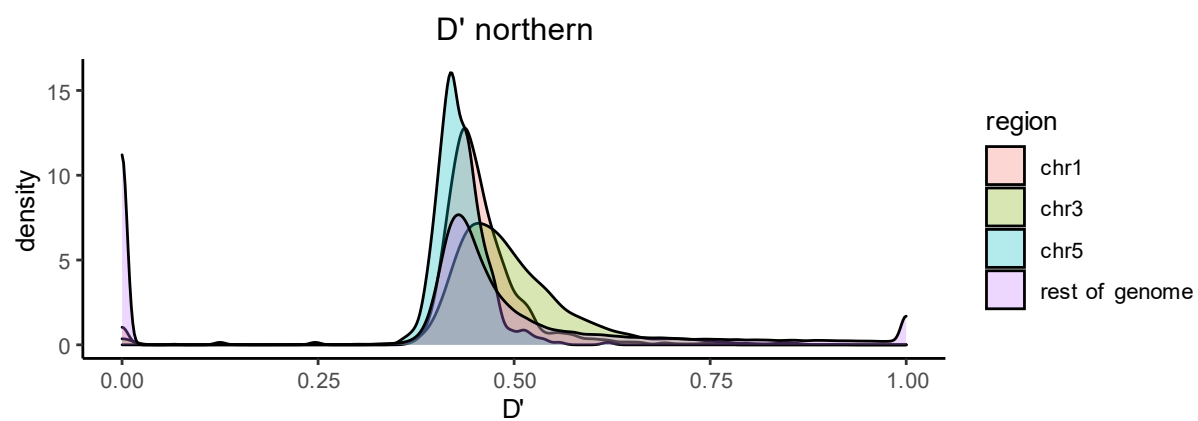

**Supplementary Figure 7.** Density plots of genetic summary statistics (nucleotide diversity, Tajima's D, Fay and Wu's H and D') in non-overlapping 10 kb windows for pure northern (N=7) and pure southern (N=10) resequenced samples (Supplementary Table 4) in each divergent chromosome region and in the rest of the genome. For D', window-based estimates represent means among pairwise comparisons of SNPs at least 1000 bp from each other and that have a minor allele frequency of at least 0.2. As D' is sensitive to sample size, we randomly removed three southern samples (0G03, 0G04 and UK) to get even sample sizes.

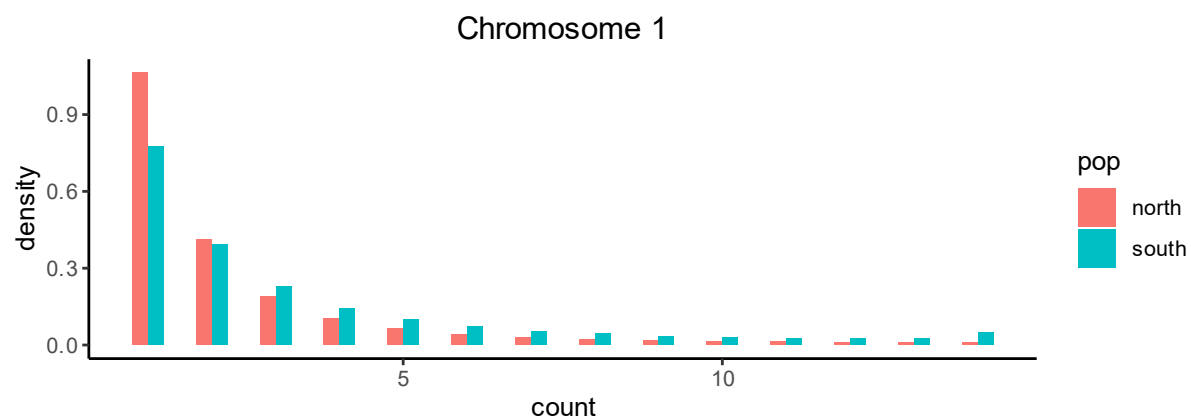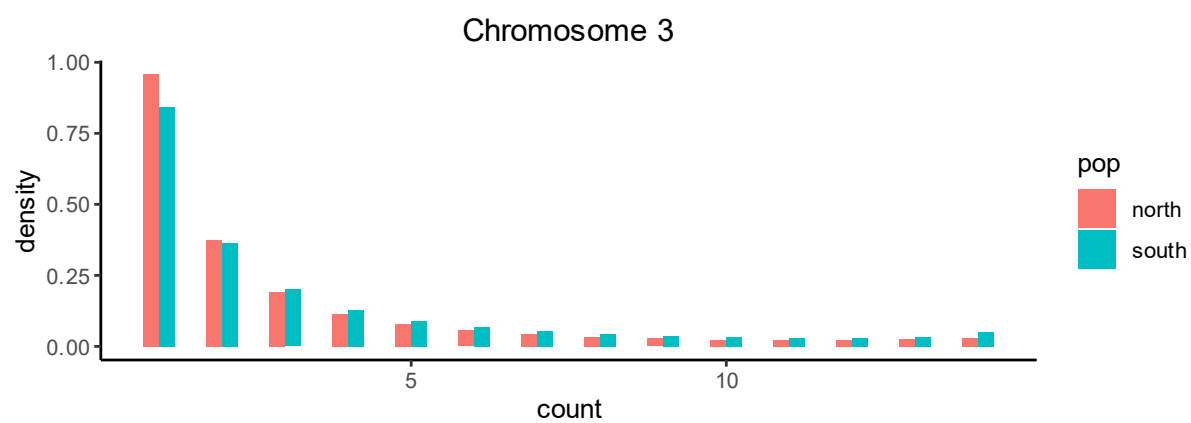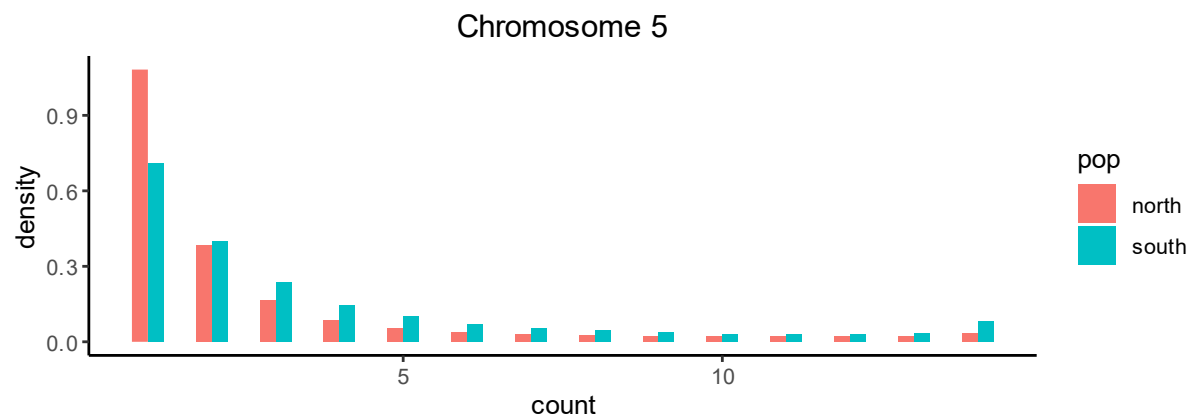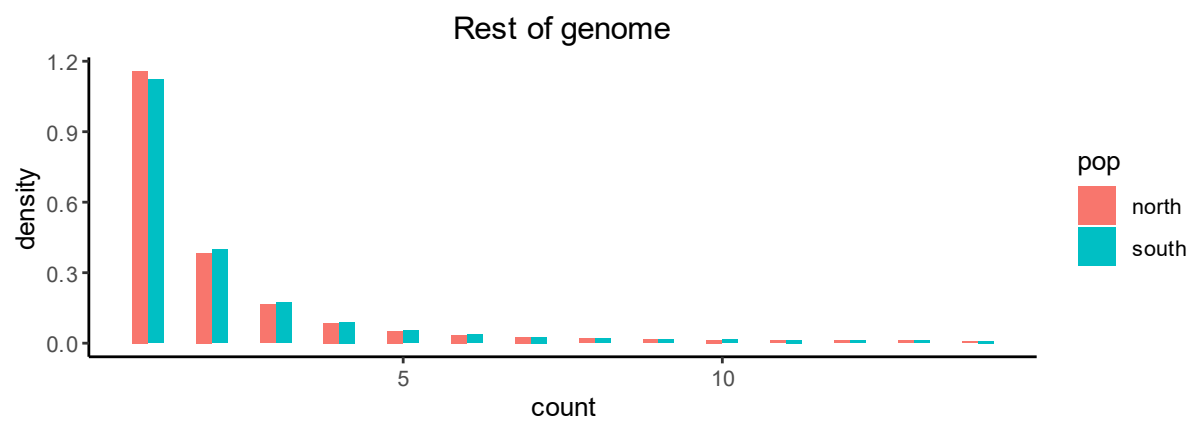

**Supplementary Figure 8.** Allele frequency spectrum of derived alleles between pure northern and pure southern resequenced samples (Supplementary Table 4) for each of the divergent chromosome regions and the rest of the genome. To simplify the contrast between the southern and northern willow warblers, we randomly removed three southern samples (0G03, 0G04 and UK06) to get even sample sizes ( $N=7$ ).

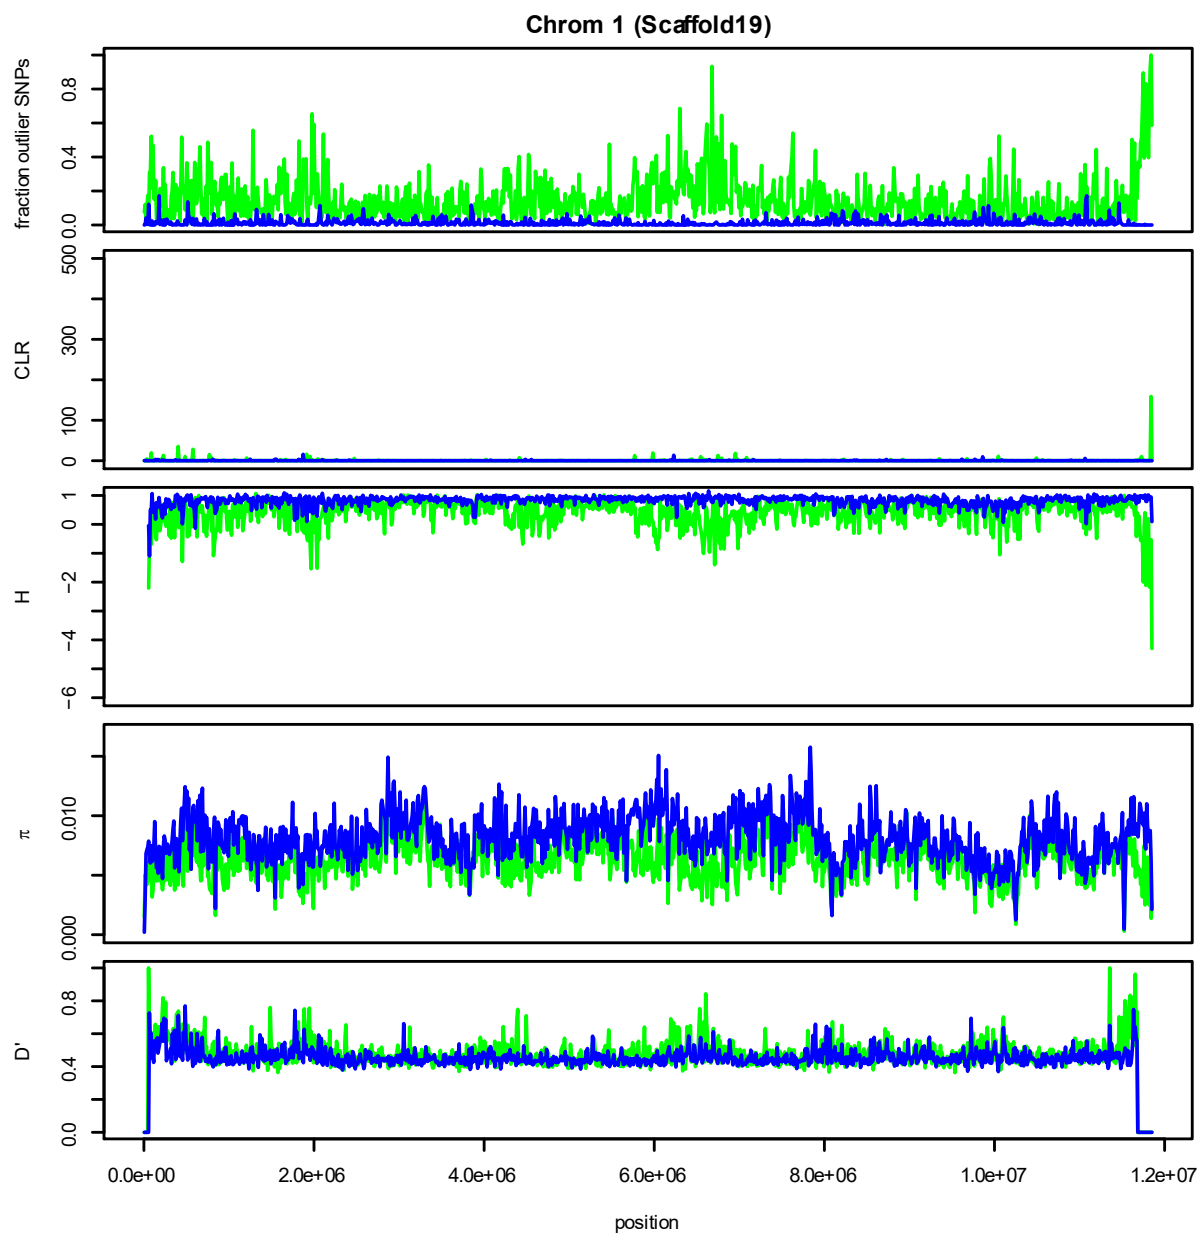



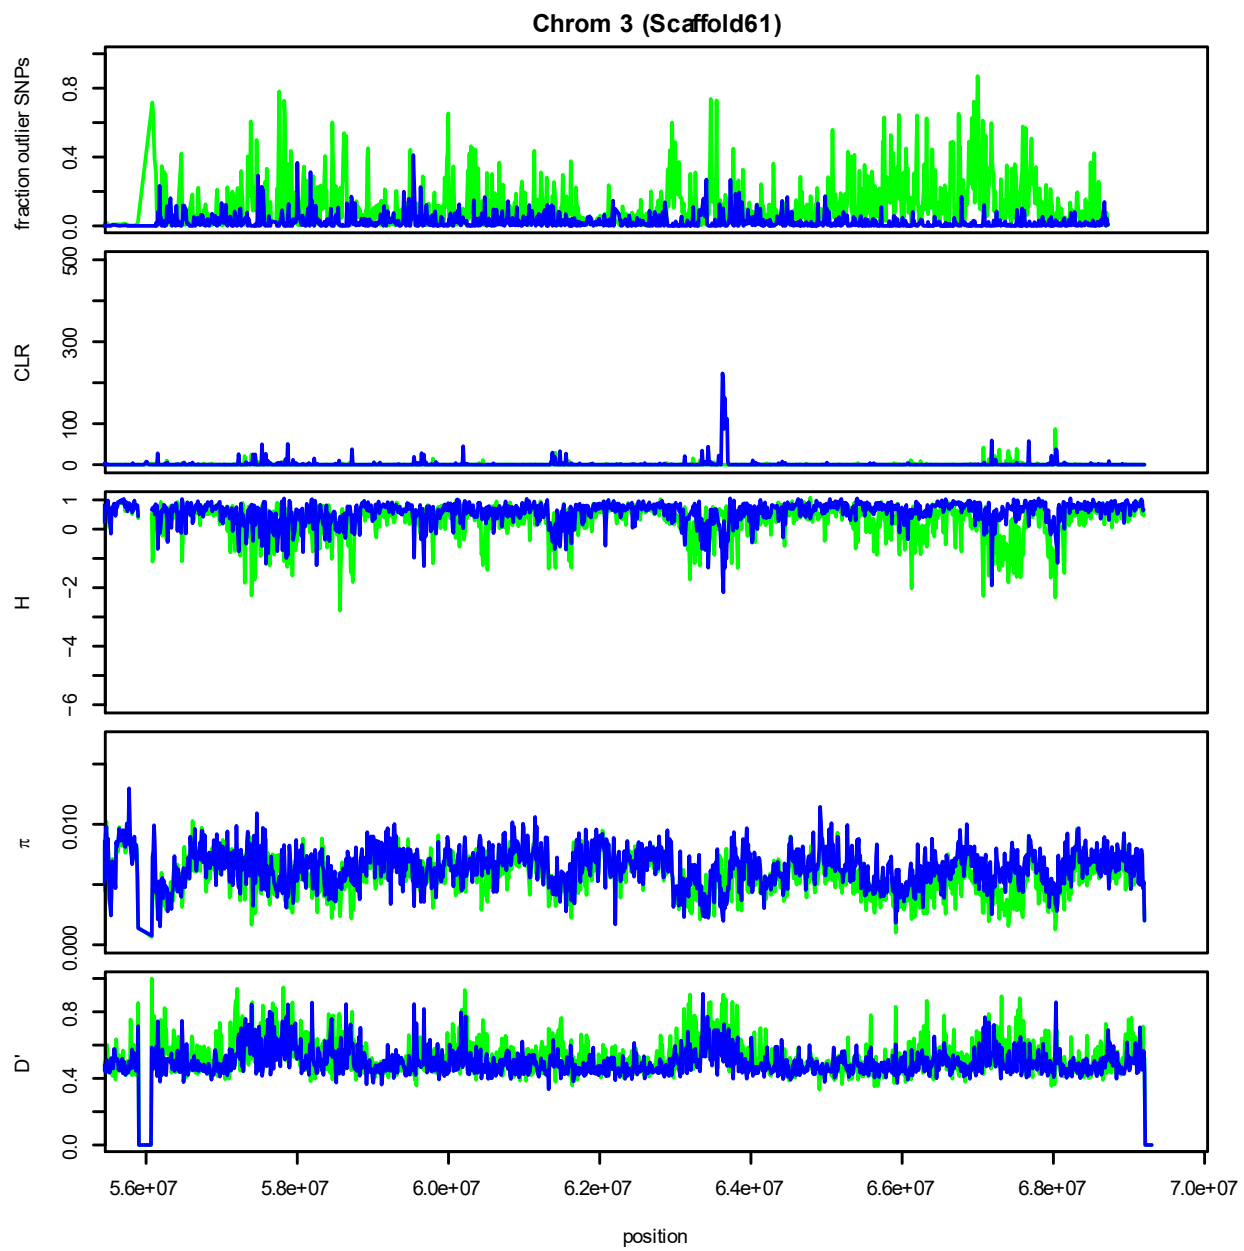

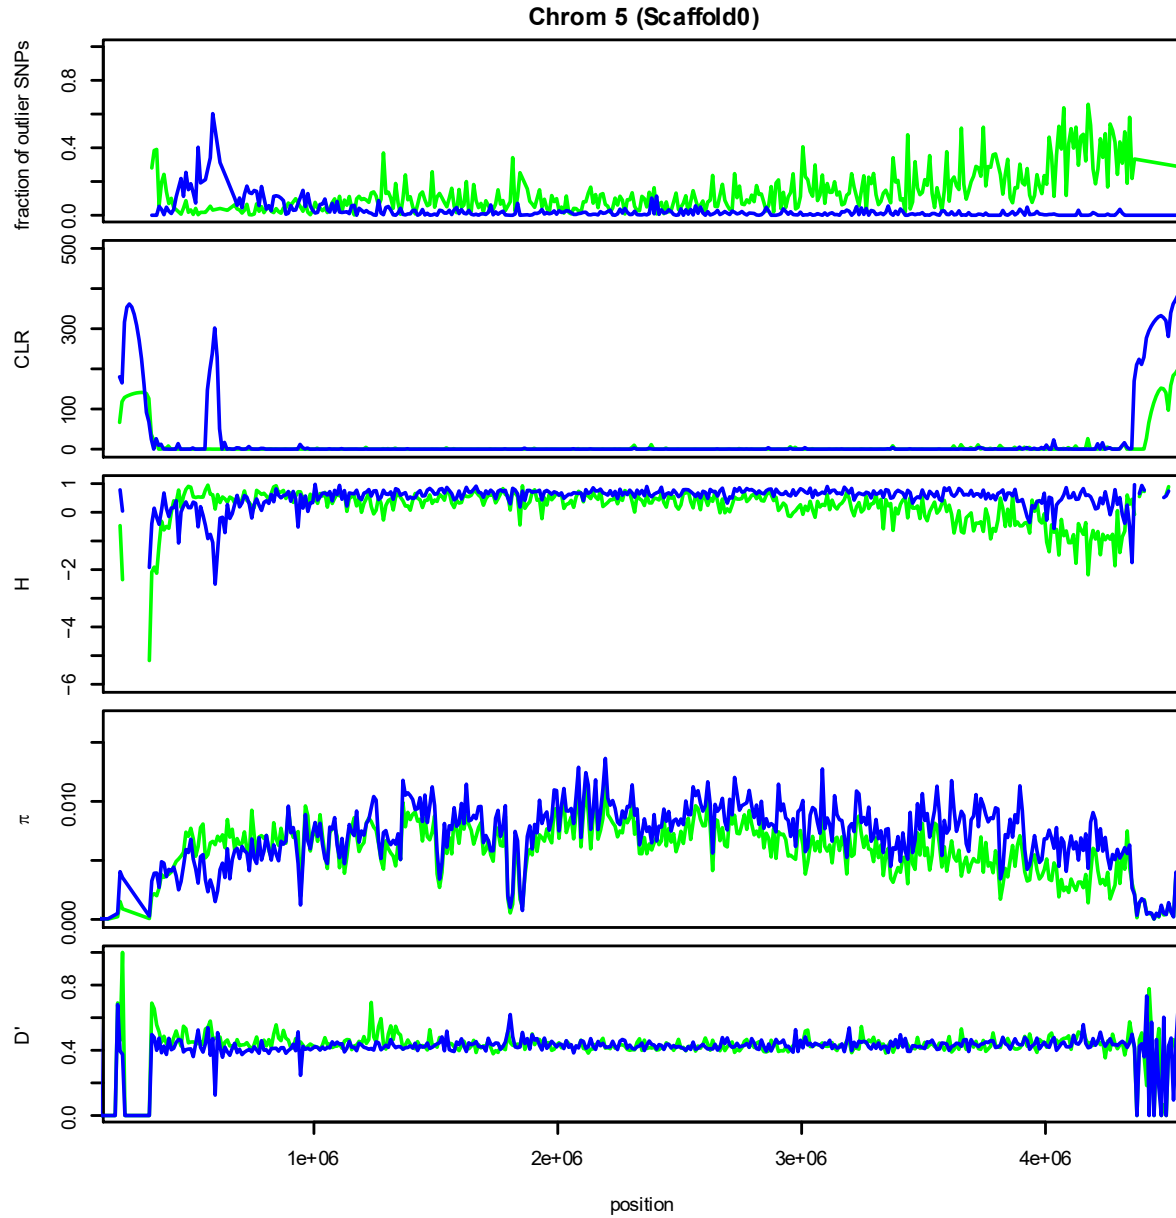

**Supplementary Figure 9.** Genetic statistics (XP-nsl, Sweepfinder2 CLR, Fay and Wu's  $H$ , nucleotide diversity and  $D'$ ) in 10 kb non-overlapping windows for pure northern (blue,  $N=7$ ) and pure southern resequenced samples (green,  $N=10$ ) (Supplementary Table 4) in each divergent region. XP-nsl estimates represent fraction of outlier SNPs ( $|\text{normalized value}| > 2$ ) in each window, where green and blue quantify an extended reduction of diversity in southern and northern samples, respectively. Linkage disequilibrium ( $D'$ ) estimates represent means among pairwise comparisons of SNPs at least 1000 bp from each other and that have a minor allele frequency of at least 0.2

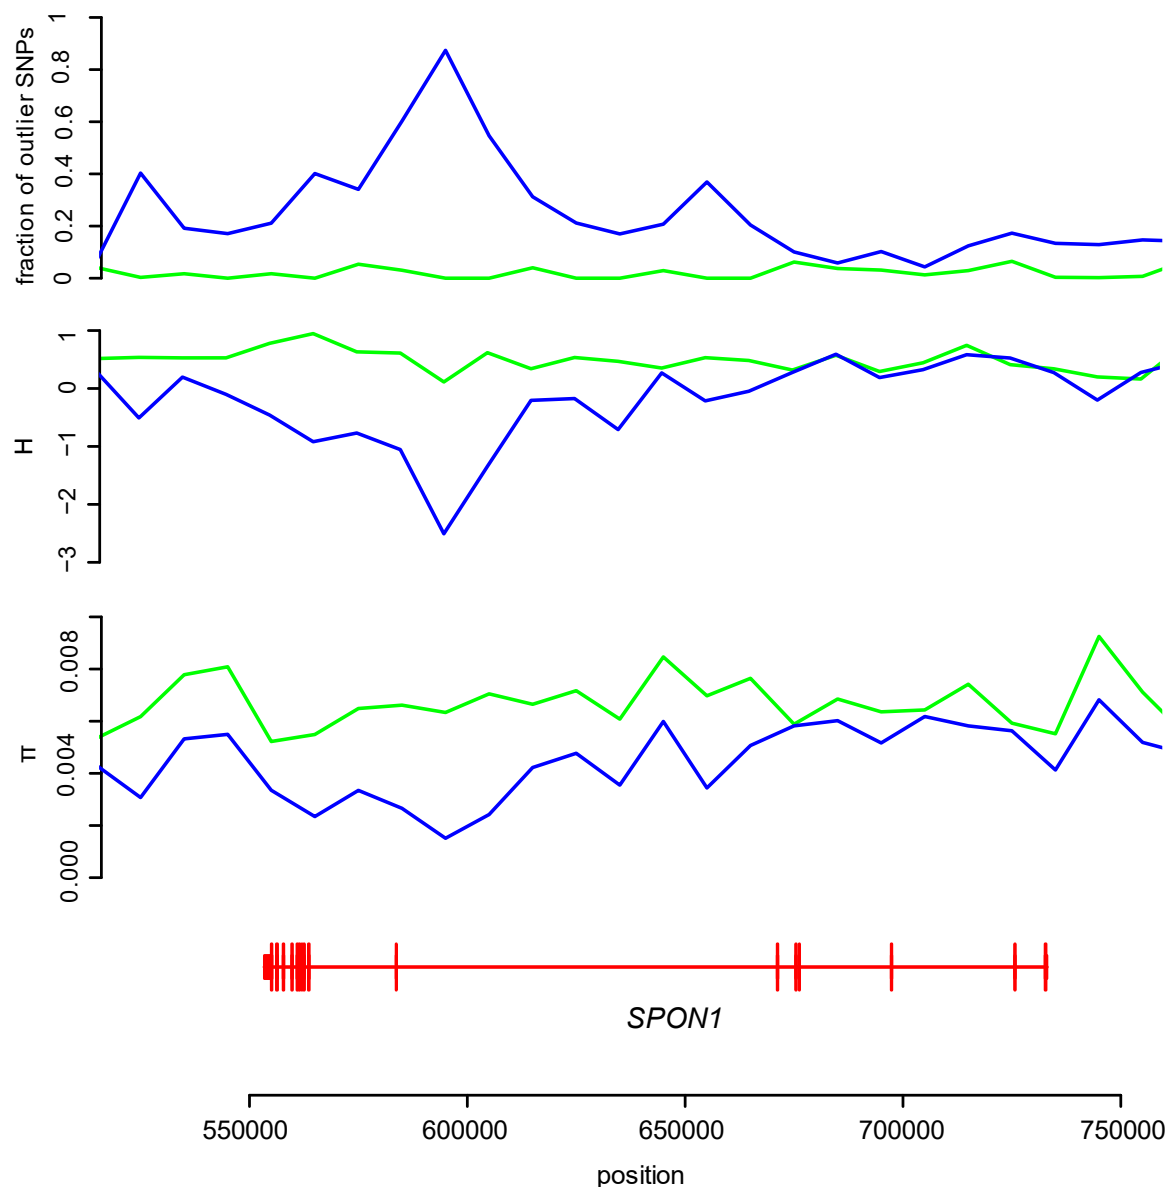

**Supplementary Figure 10.** Positive selection signatures for northern willow warblers in the *SPON1* gene, which is located at the start of the divergent region on chromosome 5 (Scaffold0). From top to bottom are non-overlapping 10 kb sliding window estimates of XP-nsl, composite likelihood ratio (CLR) statistic from Sweepfinder2 and nucleotide diversity for pure northern (blue, N=7) and pure southern (green, N=10) samples. XP-nsl is here quantified as the proportion of SNPs in each window that are genome-wide outliers ( $|\text{normalized score}| > 2$ ) and either suggesting an extended reduced diversity signal in the southern (green) or northern samples (blue).

**Supplementary Table 1.** Assembly statistics. Size measures (e.g., N50) are provided in Mb. For scaffolded assemblies contigs are defined as sequences separated by at least 25 Ns. For the Busco analysis, C refers to the number of complete orthologues and S and D, the number of those that are found as single-copy and duplicated genes, respectively. F refers to fragmented genes and M missing genes.

| Assembly                                                             | Contigs |      |      |     |      | Scaffolds |      |      |     |      |      | Busco Aves (N=4915) |                 |               |               |               |
|----------------------------------------------------------------------|---------|------|------|-----|------|-----------|------|------|-----|------|------|---------------------|-----------------|---------------|---------------|---------------|
|                                                                      | N       | Size | N50  | L50 | Max  | N         | Size | N50  | L50 | Max  | %N   | C                   | S               | D             | F             | M             |
| <i>Northern de novo assembly</i>                                     |         |      |      |     |      |           |      |      |     |      |      |                     |                 |               |               |               |
| Primary 30x unzipped contigs                                         | 2717    | 1237 | 2    | 154 | 11.1 | N/A       | N/A  | N/A  | N/A | N/A  | N/A  | 4421<br>(89.9%)     | 4154<br>(84.5%) | 267<br>(5.4%) | 249<br>(5.1%) | 245<br>(5.0%) |
| Primary 40x unzipped contigs                                         | 2737    | 1286 | 2.1  | 136 | 13   | N/A       | N/A  | N/A  | N/A | N/A  | N/A  | 4485<br>(91.3%)     | 4201<br>(85.5%) | 284<br>(5.8%) | 241<br>(4.9%) | 189<br>(3.8%) |
| Primary 40x unzipped contigs + pilon                                 | 2737    | 1286 | 2.1  | 136 | 13   | N/A       | N/A  | N/A  | N/A | N/A  | N/A  | 4572<br>(93.0%)     | 4206<br>(85.6%) | 366<br>(7.4%) | 190<br>(3.9%) | 153<br>(3.1%) |
| Supercontigs (including bionano-split contigs)                       | 2422    | 1226 | 6.1  | 41  | 35.8 | N/A       | N/A  | N/A  | N/A | N/A  | N/A  | 4539<br>(92.4%)     | 4315<br>(87.8%) | 224<br>(4.6%) | 200<br>(4.1%) | 176<br>(3.5%) |
| Supercontigs with removed haplotigs                                  | 1187    | 1113 | 7.9  | 33  | 35.8 | N/A       | N/A  | N/A  | N/A | N/A  | N/A  | 4501<br>(91.6%)     | 4435<br>(90.2%) | 66<br>(1.3%)  | 222<br>(4.5%) | 192<br>(3.9%) |
| Supercontigs with removed haplotigs + arcs                           | 1187    | 1113 | 7.9  | 33  | 35.8 | 739       | 1121 | 16.4 | 18  | 53.2 | 0.64 | 4508<br>(91.7%)     | 4447<br>(90.5%) | 61<br>(1.2%)  | 214<br>(4.4%) | 193<br>(3.9%) |
| Supercontigs with removed haplotigs + arcs + bionano                 | 7278    | 1112 | 7.9  | 33  | 35.8 | 495       | 1159 | 17.1 | 17  | 68.9 | 4.04 | 4507<br>(91.7%)     | 4442<br>(90.4%) | 65<br>(1.3%)  | 221<br>(4.5%) | 187<br>(3.8%) |
| Supercontigs with removed haplotigs + arcs + bionano + pbjelly       | 1134    | 1115 | 9.3  | 30  | 42   | 495       | 1160 | 17.1 | 17  | 68.9 | 3.92 | 4507<br>(91.7%)     | 4442<br>(90.4%) | 65<br>(1.3%)  | 221<br>(4.5%) | 187<br>(3.8%) |
| Supercontigs with removed haplotigs + arcs + bionano + pbjelly+pilon | 1134    | 1114 | 9.3  | 30  | 42   | 495       | 1160 | 17.1 | 17  | 68.9 | 3.92 | 4625<br>(94.1%)     | 4572<br>(93.1%) | 53<br>(1.1%)  | 158<br>(3.2%) | 132<br>(2.7%) |
| Final assembly                                                       | 1128    | 1114 | 9.3  | 30  | 42   | 497       | 1159 | 16.7 | 18  | 67.0 | 3.87 | 4625<br>(94.1%)     | 4572<br>(93.1%) | 53<br>(1.1%)  | 158<br>(3.2%) | 132<br>(2.7%) |
|                                                                      |         |      |      |     |      |           |      |      |     |      |      |                     |                 |               |               |               |
| <i>Southern de novo assembly</i>                                     |         |      |      |     |      |           |      |      |     |      |      |                     |                 |               |               |               |
| Hifiasm                                                              | 540     | 1247 | 34.7 | 11  | 95   | N/A       | N/A  | N/A  | N/A | N/A  | N/A  | 4674<br>(95.1%)     | 4596<br>(93.5%) | 78<br>(1.6%)  | 146<br>(3.0%) | 95<br>(1.9%)  |

|                                  |     |      |      |    |      |     |      |      |     |     |      |                 |                 |              |               |              |
|----------------------------------|-----|------|------|----|------|-----|------|------|-----|-----|------|-----------------|-----------------|--------------|---------------|--------------|
| Hifiasm + bionano + filt (final) | 986 | 1247 | 26.3 | 14 | 69.3 | 547 | 1249 | 34.1 | 12  | 90  | 0.21 | 4680<br>(95.2%) | 4606<br>(93.7%) | 74<br>(1.5%) | 141<br>(2.9%) | 94<br>(1.9%) |
|                                  |     |      |      |    |      |     |      |      |     |     |      |                 |                 |              |               |              |
| <i>Chiffchaff</i>                |     |      |      |    |      |     |      |      |     |     |      |                 |                 |              |               |              |
| Hifiasm                          | 517 | 1254 | 28.1 | 13 | 96.3 | N/A | N/A  | N/A  | N/A | N/A | N/A  | 4669<br>(95.0%) | 4576<br>(93.1%) | 93<br>(1.9%) | 151<br>(3.1%) | 95<br>(1.9%) |
| Hifiasm + filt (final)           | 517 | 1248 | 28.1 | 13 | 96.3 | N/A | N/A  | N/A  | N/A | N/A | N/A  | 4669<br>(95.0%) | 4603<br>(93.7%) | 66<br>(1.3%) | 153<br>(3.1%) | 93<br>(1.9%) |

**Supplementary Table 2.** Repeat content in the northern willow warbler assembly, southern willow warbler assembly, chiffchaff assembly and the previous northern willow warbler short-read assembly (Lundberg et al. 2017). For a more representative comparison we used the repeat library of the southern assembly to identify repeats in the previous short-read genome assembly.

|                            | <b>Northern assembly</b>      | <b>Southern assembly</b>      | <b>Chiffchaff</b>              | <b>Lundberg <i>et al.</i> 2017</b> |
|----------------------------|-------------------------------|-------------------------------|--------------------------------|------------------------------------|
| GC                         | 42.65%                        | 43.84%                        | 43.54%                         | 41.96%                             |
| Masked bases               | 172032011 bp (14.84 %)        | 261870906 bp (20.96 %)        | 264782513 bp (21.23 %)         | 103320476 bp (9.69 %)              |
|                            |                               |                               |                                |                                    |
| SINEs                      | 7799 / 934063 bp (0.08 %)     | 8468 / 955123 (0.08%)         | 6816 / 848082 bp (0.07 %)      | 7732 / 925074 bp (0.09%)           |
| ALUs                       | 0 / 0 bp (0.00 %)             | 0 / 0 bp (0.00 %)             | 0 / 0 bp (0.00 %)              | 0 / 0 bp (0.00%)                   |
| MIRs                       | 3144 / 344796 bp (0.03 %)     | 3162 / 347253 bp (0.03 %)     | 3119 / 344078 bp (0.03 %)      | 3113 / 339940 bp (0.03 %)          |
|                            |                               |                               |                                |                                    |
| LINEs                      | 151372 / 47345684 bp (4.08 %) | 160726 / 53274736 bp (4.26 %) | 160193 / 52490333 bp (4.21 %)  | 139434 / 40653367 bp (3.81 %)      |
| LINE1                      | 78 / 17852 bp (0.00 %)        | 80 / 18185 (0.00 %)           | 426 / 320689 bp (0.03 %)       | 77 / 17352 bp (0.00 %)             |
| LINE2                      | 2196 / 399350 bp (0.03 %)     | 2200 / 394836 bp (0.03 %)     | 1655 / 336472 bp (0.03 %)      | 2173 / 394424 bp (0.04 %)          |
| L3/CR1                     | 143554 / 45431238 bp (3.92 %) | 152201 / 50831847 bp (4.07 %) | 150393 / 49270575 bp (3.95 %)  | 133778 / 39916957 bp (3.74 %)      |
|                            |                               |                               |                                |                                    |
| LTR elements               | 87246 / 55670811 bp (4.80 %)  | 101321 / 69971355 bp (5.60 %) | 111405 / 115207660 bp (9.24 %) | 62565 / 29457212 bp (2.76 %)       |
| ERVL                       | 44228 / 24827029 bp (2.14 %)  | 48682 / 28023260 bp (2.24 %)  | 54066 / 34906680 bp (2.80 %)   | 33726 / 16860377 bp (1.58 %)       |
| ERVL-MaLRs                 | 0 / 0 bp (0.00 %)             | 0 / 0 bp (0.00 %)             | 0 / 0 bp (0.00 %)              | 0 / 0 bp (0.00 %)                  |
| ERV_classI                 | 19085 / 15006029 bp (1.29 %)  | 23379 / 18784528 bp (1.50 %)  | 22780 / 18318440 bp (1.47 %)   | 11473 / 5156808 bp (0.48 %)        |
| ERV_classII                | 18867 / 11790452 bp (1.02 %)  | 22164 / 14855344 bp (1.19 %)  | 30510 / 59377991 bp (4.76 %)   | 14656 / 6367209 bp (0.60 %)        |
|                            |                               |                               |                                |                                    |
| DNA elements               | 34494 / 17705493 bp (1.53 %)  | 37518 / 19720192 bp (1.58 %)  | 25172 / 7946391 bp (0.64 %)    | 20461 / 3205395 bp (0.30 %)        |
| hAT-Charlie                | 165 / 51112 bp (0.00 %)       | 161 / 50769 (0.00 %)          | 166 / 52468 bp (0.00 %)        | 160 / 50734 bp (0.00 %)            |
| TcMar-Tigger               | 265 / 46372 bp (0.00 %)       | 259 / 46024 bp (0.00 %)       | 271 / 47481 bp (0.00 %)        | 267 / 46564 bp (0.00 %)            |
|                            |                               |                               |                                |                                    |
| Unclassified               | 51779 / 22692495 bp (1.96 %)  | 68749 / 79466852 bp (6.36 %)  | 58419 / 54893638 bp (4.40 %)   | 29687 / 10044218 bp (0.94 %)       |
|                            |                               |                               |                                |                                    |
| Total interspersed repeats | 144348546 bp (12.45 %)        | 223388258 bp (17.88 %)        | 231386104 bp (18.55 %)         | 84285266 bp (7.90 %)               |

**Supplementary Table 3.** RNAseq libraries used for gene annotation. All samples are derived from whole brain tissue. Accession refers to accession number in the Sequence Read Archive.

| <b>Sample name</b> | <b>Accession</b> | <b>Sample description</b>                   | <b>Raw read pairs</b> | <b>Trimmed read pairs</b> |
|--------------------|------------------|---------------------------------------------|-----------------------|---------------------------|
| 08A02              | SRX9729390       | Adult male breeding, Silvåkra, Sweden       | 35 888 086            | 35 723 400                |
| 08A04              | SRX9729391       | Adult male breeding, Silvåkra, Sweden       | 41 672 026            | 41 442 300                |
| 08G05              | SRX9729392       | Adult male breeding, Tångböle, Sweden       | 43 411 334            | 43 154 635                |
| 08xA10             | SRX9729393       | Juvenile male migrating, Stensoffa, Sweden  | 36 588 683            | 36 426 124                |
| 08xB03             | SRX9729394       | Juvenile male migrating, Skeppshamn, Sweden | 36 676 212            | 36 472 877                |
| 08xB13             | SRX9729395       | Adult male migrating, Skeppshamn, Sweden    | 42 623 335            | 42 385 992                |

**Supplementary Table 4.** Whole-genome resequencing libraries and 10x chromium linked read libraries. The first 18 resequencing samples were used in Lundberg et al. (2017). Divergent region genotypes are the genotypes for the regions on chromosomes 1, 3 and 5, where S and N denote homozygous southern and northern, respectively, and H heterozygous southern/northern. Samples marked with \* were used in the divergence time analyses. Mean coverage has been calculated for sites in the northern genome with nonzero coverage and excluding alignments with mapping quality < 1. Accession refers to accession number in the Sequence Read Archive.

| Sample                           | Accession             | Sample type             | Divergent chromosome region genotype | Sample location                   | Library type                | Sequencing setup    | Mean cov |
|----------------------------------|-----------------------|-------------------------|--------------------------------------|-----------------------------------|-----------------------------|---------------------|----------|
|                                  |                       |                         |                                      |                                   |                             |                     |          |
| <i>Whole-genome resequencing</i> |                       |                         |                                      |                                   |                             |                     |          |
| 0G03                             | SRX1764074-SRX1764079 | <i>trochilus</i> (male) | SSS                                  | Stensoffa, Sweden, 55.7°N, 13.4°E | 670 bp, Truseq DNA PCR free | Hiseq2000, 2x100 bp | 7        |
| 0G04                             | SRX1764080-SRX1764085 | <i>trochilus</i> (male) | SSS                                  | Stensoffa, Sweden, 55.7°N, 13.4°E | 670 bp, Truseq DNA PCR free | Hiseq2000, 2x100 bp | 6        |
| 0G10                             | SRX1764086-SRX1764091 | <i>trochilus</i> (male) | SSS                                  | Stensoffa, Sweden, 55.7°N, 13.4°E | 670 bp, Truseq DNA PCR free | Hiseq2000, 2x100 bp | 7        |
| 0J01                             | SRX1764092-SRX1764097 | <i>trochilus</i> (male) | SSS                                  | Smedstorp, Sweden, 59.6°N, 15.0°E | 670 bp, Truseq DNA PCR free | Hiseq2000, 2x100 bp | 7        |
| 1K05                             | SRX1764098-SRX1764103 | <i>acredula</i> (male)  | NHN                                  | Tornehamn, Sweden, 68.4°N, 18.6°E | 670 bp, Truseq DNA PCR free | Hiseq2000, 2x100 bp | 8        |
| 1K10                             | SRX1764104-SRX1764109 | <i>acredula</i> (male)  | NNN                                  | Tornehamn, Sweden, 68.4°N, 18.6°E | 670 bp, Truseq DNA PCR free | Hiseq2000, 2x100 bp | 8        |
| 1L17                             | SRX1764110-SRX1764115 | <i>acredula</i> (male)  | NNN                                  | Stordalen, Sweden, 68.3°N, 19.1°E | 670 bp, Truseq DNA PCR free | Hiseq2000, 2x100 bp | 8        |



|       |                           |                           |     |                                       |                                |                        |    |
|-------|---------------------------|---------------------------|-----|---------------------------------------|--------------------------------|------------------------|----|
| 1L19* | SRX1736538                | <i>acredula</i> (male)    | NNN | Stordalen, Sweden,<br>68.3°N, 19.1°E  | 670 bp, Truseq DNA PCR<br>free | Hiseq2500, 2x125<br>bp | 44 |
| 1L20  | SRX1764116-<br>SRX1764121 | <i>acredula</i> (male)    | NNN | Stordalen, Sweden,<br>68.3°N, 19.1°E  | 670 bp, TruSeq DNA PCR<br>free | Hiseq2000, 2x100<br>bp | 7  |
| 1M08  | SRX1764122-<br>SRX1764127 | <i>acredula</i> (male)    | NNN | Kaisepakte, Sweden,<br>68.3°N, 19.3°E | 670 bp, Truseq DNA PCR<br>free | Hiseq2000, 2x100<br>bp | 7  |
| 1O01  | SRX1764128-<br>SRX1764133 | <i>acredula</i> (male)    | NNN | Kallax, Sweden,<br>65.5°N, 22.1°E     | 670 bp, Truseq DNA PCR<br>free | Hiseq2000, 2x100<br>bp | 14 |
| 1O04  | SRX1764134-<br>SRX1764139 | <i>acredula</i> (male)    | NSN | Kallax, Sweden,<br>65.5°N, 22.1°E     | 670 bp, Truseq DNA PCR<br>free | Hiseq2000, 2x100<br>bp | 14 |
| 1O06  | SRX1764140-<br>SRX1764145 | <i>acredula</i> (male)    | HSN | Kallax, Sweden,<br>65.5°N, 22.1°E     | 670 bp, Truseq DNA PCR<br>free | Hiseq2000, 2x100<br>bp | 11 |
| 1P02  | SRX1764146-<br>SRX1764151 | <i>trochilus</i> (male)   | SSS | Barkö, Sweden,<br>60.2°N, 18.2°E      | 670 bp, Truseq DNA PCR<br>free | Hiseq2000, 2x100<br>bp | 9  |
| 3K06  | SRX1764152-<br>SRX1764157 | <i>trochilus</i> (male)   | SSH | Gräsmarö, Sweden,<br>58.3°N, 17.0°E   | 670 bp, Truseq DNA PCR<br>free | Hiseq2000, 2x100<br>bp | 8  |
| 7A12  | SRX1764170-<br>SRX1764175 | <i>trochilus</i> (male)   | SSS | Haganäs, Sweden,<br>56.3°N, 14.7°E    | 670 bp, Truseq DNA PCR<br>free | Hiseq2000, 2x100<br>bp | 7  |
| 96A01 | SRX1764158-<br>SRX1764163 | <i>trochilus</i> (male)   | SSS | Stensoffa, Sweden,<br>55.7°N, 13.4°E  | 670 bp, Truseq DNA PCR<br>free | Hiseq2000, 2x100<br>bp | 7  |
| 96B07 | SRX1764164-<br>SRX1764169 | <i>trochilus</i> (male)   | SSS | Kvismaren, Sweden,<br>59.2°N, 15.4°E  | 670 bp, Truseq DNA PCR<br>free | Hiseq2000, 2x100<br>bp | 8  |
| 1A05* | SRX9717361                | <i>trochilus</i> (female) | SSS | Stensoffa, Sweden,<br>55.7°N, 13.4°E  | 350 bp, TruSeq Nano DNA        | HiseqX, 2x150 bp       | 24 |
| 1M13* | SRX9738264                | <i>acredula</i> (female)  | NNN | Kaisepakte, Sweden,<br>68.3°N, 19.3°E | 350 bp, TruSeq Nano DNA        | HiseqX, 2x150 bp       | 26 |
| 1N12  | SRX9719306                | <i>acredula</i> (female)  | NSN | Altajärvi, Sweden,<br>67.8°N, 20.5°E  | 350 bp, TruSeq Nano DNA        | HiseqX, 2x150 bp       | 20 |

|                                |             |                                                        |     |                                          |                             |                      |    |
|--------------------------------|-------------|--------------------------------------------------------|-----|------------------------------------------|-----------------------------|----------------------|----|
| UK06*                          | SRX9710091  | <i>trochilus</i> (female)                              | SSS | Fife, United Kingdom, 56.2°N, 3.1°W      | 670 bp, Truseq DNA PCR free | HiseqX, 2x150 bp     | 29 |
| DW83                           | SRX9759343  | Dusky warbler<br><i>Phylloscopus fuscatus</i> (female) | N/A | Malkachan river, Russia, 59.5°N, 154.1°E | 550 bp, Neoprep             | HiseqX, 2x150 bp     | 32 |
|                                |             |                                                        |     |                                          |                             |                      |    |
| <i>Linked reads</i>            |             |                                                        |     |                                          |                             |                      |    |
| CP59520<br>(northern assembly) | SRX9809766  | <i>acredula</i> (male)                                 | NNN | Krankesjön, Sweden, 55.7°N, 13.4°E       | 10x chromium                | HiseqX 2x150 bp      | 84 |
| CP59525<br>(southern assembly) | SRX9804925  | <i>trochilus</i> (male)                                | SSS | Krankesjön, Sweden, 55.7°N, 13.4°E       | 10x chromium                | HiseqX 2x150 bp      | 59 |
| DD81063                        | SRX14774353 | male                                                   | SHS | Krankesjön, Sweden, 55.7°N, 13.4°E       | 10x chromium                | NovaSeq6000 2x150 bp | 65 |

**Supplementary Table 5.** Number of highly differentiated variants between 11 resequenced birds from each subspecies that are located in each divergent region and in the rest of the genome.

| <b>F<sub>ST</sub> threshold</b> | <b>Chr1</b>   | <b>Chr3</b>   | <b>Chr5</b>  | <b>Other (N scaffolds)</b> |
|---------------------------------|---------------|---------------|--------------|----------------------------|
| 0.5                             | 21887 (49.3%) | 11027 (24.8%) | 9880 (22.3%) | 1610 (3.6%, 81 scaffolds)  |
| 0.6                             | 12754 (54.2%) | 3996 (17.0%)  | 6432 (27.3%) | 342 (1.5%, 53 scaffolds)   |
| 0.7                             | 7224 (60.9%)  | 393 (3.3%)    | 4098 (34.6%) | 140 (1.2%, 24 scaffolds)   |
| 0.8                             | 3269 (56.7%)  | 21 (0.4%)     | 2416 (41.9%) | 58 (1.0%, 10 scaffolds)    |
| 0.9                             | 654 (37.0%)   | 2 (0.1%)      | 1094 (61.9%) | 17 (1.0%, 5 scaffolds)     |
| 1                               | 21 (10.8%)    | 0 (0%)        | 165 (84.6%)  | 9 (4.6%, 2 scaffolds)      |

**Supplementary Table 6.** Divergence statistics

| <b>Region</b> | <b>dxy</b> | <b>pi north</b> | <b>pi south</b> | <b>da</b> | <b>divergence time (years)</b> | <b>RND dusky warbler</b> |
|---------------|------------|-----------------|-----------------|-----------|--------------------------------|--------------------------|
| Chromosome 1  | 0.012      | 0.010           | 0.008           | 0.003     | 511 848                        | 0.409                    |
| Chromosome 3  | 0.010      | 0.007           | 0.006           | 0.003     | 544 185                        | 0.352                    |
| Chromosome 5  | 0.013      | 0.011           | 0.009           | 0.003     | 538 641                        | 0.389                    |

**Supplementary Table 7.** Demographic parameter estimates. Ne: Effective population size, me: migration rate, SI: Strict Isolation, IM2: Isolation with migration model 2.

| <b>chromosome_1 - SI</b>                                 |                    |                    |                     |                    |            |
|----------------------------------------------------------|--------------------|--------------------|---------------------|--------------------|------------|
|                                                          | <b>Ne_northern</b> | <b>Ne_southern</b> | <b>Ne_ancestral</b> | <b>split_years</b> | <b>m_e</b> |
| MCL                                                      | 1 566 413          | 592 968            | 273 471             | 1 197 770          | NA         |
| SIM_SD                                                   | 41 138             | 10 662             | 2 672               | 8 056              | NA         |
| SIM_mean                                                 | 1 658 205          | 614 056            | 236 147             | 1 275 983          | NA         |
| Bias                                                     | 91 792             | 21 088             | -37 325             | 78 212             | NA         |
|                                                          |                    |                    |                     |                    |            |
| <b>chromosome_3 - IM2</b>                                |                    |                    |                     |                    |            |
|                                                          | <b>Ne_northern</b> | <b>Ne_southern</b> | <b>Ne_ancestral</b> | <b>split_years</b> | <b>m_e</b> |
| MCL                                                      | 665 708            | 323 997            | 176 903             | 1 302 349          | 6.53E-07   |
| SIM_SD                                                   | 19 911             | 7233               | 7225                | 30 667             | 4.06E-08   |
| SIM_mean                                                 | 661 595            | 296 279            | 89 084              | 1 617 953          | 8.11E-07   |
| Bias                                                     | -4 113             | -27 718            | -87 819             | 315 604            | 1.58E-07   |
|                                                          |                    |                    |                     |                    |            |
| <b>chromosome_5 - SI</b>                                 |                    |                    |                     |                    |            |
|                                                          | <b>Ne_northern</b> | <b>Ne_southern</b> | <b>Ne_ancestral</b> | <b>split_years</b> | <b>m_e</b> |
| MCL                                                      | 1 519 746          | 703 791            | 318 141             | 1 218 887          | NA         |
| SIM_SD                                                   | 67 767             | 21 671             | 4 123               | 12 098             | NA         |
| SIM_mean                                                 | 1 639 923          | 742 029            | 265 375             | 1 340 160          | NA         |
| Bias                                                     | 120 177            | 38 238             | -52 766             | 121 272            | NA         |
|                                                          |                    |                    |                     |                    |            |
| <b>Rest of the genome - SI synced in all populations</b> |                    |                    |                     |                    |            |
|                                                          | <b>Ne</b>          | <b>split_years</b> |                     |                    |            |
| MCL                                                      | 459 177            | 101 930            |                     |                    |            |

**Supplementary Table 8.** Gene annotations closest to breakpoints. Breakpoints have been defined as endpoints of alignments of the northern assembly.

| Breakpoint | Position            | Gene model              | Gene                                                                          | Distance from breakpoint/orientation relative gene start |
|------------|---------------------|-------------------------|-------------------------------------------------------------------------------|----------------------------------------------------------|
| Chr1_start | Scaffold19:58075    | Phtr_g5241_UFM1         | Ubiquitin-fold modifier 1 ( <i>UFM1</i> )                                     | 44.0 kb downstream                                       |
| Chr1_mid   | Scaffold19:7980361  | Phtr_g27883_COG3        | Component Of Oligomeric Golgi Complex 3 ( <i>COG3</i> )                       | 6.1 kb upstream                                          |
| Chr1_end   | Scaffold19:11680761 | Phtr_g9056_FREM2        | FRAS1 Related Extracellular Matrix 2 ( <i>FREM2</i> )                         | 71.2 kb upstream                                         |
| Chr3_start | Scaffold61:56069986 | Phtr_g20118_COA6        | Cytochrome C Oxidase Assembly Factor 6 ( <i>COA6</i> )                        | 11.6 kb upstream                                         |
| Chr3_end   | Scaffold61:69205658 | Phtr_g10669_WTAP        | WT1 Associated Protein ( <i>WTAP</i> )                                        | 2.9 kb upstream                                          |
| Chr5_start | Scaffold0:327097    | Phtr_g7229_OLFML1       | Olfactomedin Like 1 ( <i>OLFML1</i> )                                         | 3.5 kb downstream                                        |
| Chr5_mid   | Scaffold0:3917392   | Phtr_g5159_ANO3         | Anoctamin 3 ( <i>ANO3</i> )                                                   | 13.4 kb upstream                                         |
| Chr5_end   | Scaffold0:4361809   | Phtr_g10614_MAS1-like-2 | MAS1 Proto-Oncogene, G Protein-Coupled Receptor-like-2 ( <i>MAS1-like-2</i> ) | 1.5 kb upstream                                          |

**Supplementary Table 9.** Highly differentiated variants ( $F_{ST} \geq 0.7$ ) between southern and northern homozygotes in each of the divergent chromosome regions that have a predicted impact on the protein-coding sequence of genes. For type, M refers to missense variant, C conservative inframe insertion, S splice region variant and F frameshift variant.

| Scaffold   | Position | FST     | REF | ALT | Gene model         | Gene                                                                   | Type |
|------------|----------|---------|-----|-----|--------------------|------------------------------------------------------------------------|------|
| Scaffold19 | 1087641  | 0.70867 | T   | G   | Phtr_g1064_CCDC169 | coiled-coil domain containing 169 ( <i>CCDC169</i> )                   | M    |
| Scaffold19 | 1319577  | 0.80765 | T   | C   | Phtr_g19298_DCLK1  | doublecortin like kinase 1 ( <i>DCLK1</i> )                            | M    |
| Scaffold19 | 2598010  | 0.71456 | C   | T   | Phtr_g10529_KL     | klotho ( <i>KL</i> )                                                   | M    |
| Scaffold19 | 2885581  | 0.9501  | A   | T   | Phtr_g5904_N4BP2L2 | NEDD4 binding protein 2 like 2 ( <i>N4BP2L2</i> )                      | M    |
| Scaffold19 | 2886086  | 0.70437 | G   | A   | Phtr_g5904_N4BP2L2 | NEDD4 binding protein 2 like 2 ( <i>N4BP2L2</i> )                      | M    |
| Scaffold19 | 2886300  | 0.83204 | A   | C   | Phtr_g5904_N4BP2L2 | NEDD4 binding protein 2 like 2 ( <i>N4BP2L2</i> )                      | M    |
| Scaffold19 | 2886494  | 0.79167 | G   | A   | Phtr_g5904_N4BP2L2 | NEDD4 binding protein 2 like 2 ( <i>N4BP2L2</i> )                      | M    |
| Scaffold19 | 2931630  | 0.76995 | G   | A   | Phtr_g21712_BRCA2  | BRCA2, DNA repair associated ( <i>BRCA2</i> )                          | M    |
| Scaffold19 | 4319909  | 0.88933 | A   | G   | Phtr_g5007_FLT1    | fms related receptor tyrosine kinase 1 ( <i>FLT1</i> )                 | M    |
| Scaffold19 | 4381077  | 1       | C   | A   | Phtr_g11922_PAN3   | PAN3 poly(A) specific ribonuclease subunit ( <i>PAN3</i> )             | M,S  |
| Scaffold19 | 4577265  | 0.75667 | G   | A   | Phtr_g11669_POLR1D | DNA-directed RNA polymerases I and III subunit RPAC2 ( <i>POLR1D</i> ) | M    |
| Scaffold19 | 4692444  | 0.80097 | AT  | A   | Phtr_g5915_GTF3A   | general transcription factor IIIA ( <i>GTF3A</i> )                     | F    |
| Scaffold19 | 4693137  | 0.77239 | T   | C   | Phtr_g5915_GTF3A   | general transcription factor IIIA ( <i>GTF3A</i> )                     | M    |
| Scaffold19 | 4693216  | 0.7557  | G   | T   | Phtr_g5915_GTF3A   | general transcription factor IIIA ( <i>GTF3A</i> )                     | M    |
| Scaffold19 | 4694975  | 1       | T   | G   | Phtr_g5915_GTF3A   | general transcription factor IIIA ( <i>GTF3A</i> )                     | M    |
| Scaffold19 | 5160229  | 0.71862 | T   | C   | Phtr_g14759_RNF6   | ring finger protein 6 ( <i>RNF6</i> )                                  | M    |
| Scaffold19 | 5815740  | 0.81859 | G   | A   | Phtr_g4856_SPATA13 | spermatogenesis associated 13 ( <i>SPATA13</i> )                       | M    |
| Scaffold19 | 7312964  | 0.84314 | A   | G   | Phtr_g6595_CRYL1   | crystallin lambda 1 ( <i>CRYL1</i> )                                   | M    |
| Scaffold19 | 7514106  | 0.7114  | C   | T   | Phtr_g26383_ZMYM2  | Zinc finger MYM-type protein 2 ( <i>ZMYM2</i> )                        | M    |
| Scaffold19 | 8066066  | 1       | TG  | CA  | Phtr_g7324_CBY2    | Protein chibby homolog 2 ( <i>CBY2</i> )                               | M    |
| Scaffold19 | 8226288  | 0.79913 | T   | C   | Phtr_g4607_CPB2    | carboxypeptidase B2 ( <i>CPB2</i> )                                    | M    |

|            |         |         |   |      |                    |                                                                      |     |
|------------|---------|---------|---|------|--------------------|----------------------------------------------------------------------|-----|
| Scaffold19 | 8999053 | 0.86762 | A | ACCT | Phtr_g21368_RB1    | RB transcriptional corepressor 1 ( <i>RB1</i> )                      | C   |
| Scaffold19 | 1.1E+07 | 0.80936 | T | C    | Phtr_g19921_CKAP2  | cytoskeleton associated protein 2 ( <i>CKAP2</i> )                   | M   |
| Scaffold61 | 5.8E+07 | 0.76504 | C | A    | Phtr_g19478_FMN2   | formin 2 ( <i>FMN2</i> )                                             | M   |
| Scaffold61 | 5.9E+07 | 0.82696 | A | G    | Phtr_g17712_WDR64  | WD repeat domain 64 ( <i>WDR64</i> )                                 | M   |
| Scaffold61 | 5.9E+07 | 0.78868 | T | A    | Phtr_g17712_WDR64  | WD repeat domain 64 ( <i>WDR64</i> )                                 | M   |
| Scaffold61 | 5.9E+07 | 0.76508 | C | G    | Phtr_g745_TAB2     | TGF-beta activated kinase 1/MAP3K7 binding protein 2 ( <i>TAB2</i> ) | M   |
| Scaffold61 | 6.1E+07 | 0.80527 | G | A    | Phtr_g12364_UTRN   | utrophin ( <i>UTRN</i> )                                             | M   |
| Scaffold61 | 6.2E+07 | 0.94191 | T | C    | Phtr_g22448_MTFR2  | mitochondrial fission regulator 2 ( <i>MTFR2</i> )                   | M   |
| Scaffold61 | 6.2E+07 | 0.7972  | C | G    | Phtr_g22448_MTFR2  | mitochondrial fission regulator 2 ( <i>MTFR2</i> )                   | M   |
| Scaffold61 | 6.2E+07 | 0.75269 | A | T    | Phtr_g22448_MTFR2  | mitochondrial fission regulator 2 ( <i>MTFR2</i> )                   | M   |
| Scaffold61 | 6.2E+07 | 0.76818 | A | G    | Phtr_g17255_KPNA2  | Importin subunit alpha-2 ( <i>KPNA2</i> )                            | M   |
| Scaffold61 | 6.2E+07 | 0.7368  | T | C    | Phtr_g26752_IFNGR1 | interferon gamma receptor 1 ( <i>IFNGR1</i> )                        | M   |
| Scaffold61 | 6.7E+07 | 0.88617 | G | C    | Phtr_g28041_SCAF8  | SR-related CTD associated factor 8 ( <i>SCAF8</i> )                  | M   |
| Scaffold61 | 6.7E+07 | 0.75267 | T | C    | Phtr_g28041_SCAF8  | SR-related CTD associated factor 8 ( <i>SCAF8</i> )                  | M   |
| Scaffold61 | 6.7E+07 | 0.75267 | A | G    | Phtr_g28041_SCAF8  | SR-related CTD associated factor 8 ( <i>SCAF8</i> )                  | M   |
| Scaffold61 | 6.7E+07 | 0.94344 | A | G    | Phtr_g28041_SCAF8  | SR-related CTD associated factor 8 ( <i>SCAF8</i> )                  | M   |
| Scaffold61 | 6.7E+07 | 0.7395  | T | G    | Phtr_g11696_IPCEF1 | tohesin exchange factors 1 ( <i>IPCEF1</i> )                         | M   |
| Scaffold61 | 6.8E+07 | 0.84791 | T | G    | Phtr_g6597_SYNE1   | spectrin repeat containing, nuclear envelope 1 ( <i>SYNE1</i> )      | M   |
| Scaffold61 | 6.8E+07 | 0.7166  | A | G    | Phtr_g6597_SYNE1   | spectrin repeat containing, nuclear envelope 1 ( <i>SYNE1</i> )      | M,S |
| Scaffold61 | 6.8E+07 | 0.82696 | G | A    | Phtr_g6597_SYNE1   | spectrin repeat containing, nuclear envelope 1 ( <i>SYNE1</i> )      | M   |
| Scaffold61 | 6.8E+07 | 0.71401 | A | C    | Phtr_g6597_SYNE1   | spectrin repeat containing, nuclear envelope 1 ( <i>SYNE1</i> )      | M   |
| Scaffold61 | 6.8E+07 | 0.82498 | C | G,T  | Phtr_g6597_SYNE1   | spectrin repeat containing, nuclear envelope 1 ( <i>SYNE1</i> )      | M   |
| Scaffold61 | 6.8E+07 | 0.81959 | C | A    | Phtr_g6597_SYNE1   | spectrin repeat containing, nuclear envelope 1 ( <i>SYNE1</i> )      | M   |

|            |         |         |   |   |                       |                                                                           |   |
|------------|---------|---------|---|---|-----------------------|---------------------------------------------------------------------------|---|
| Scaffold61 | 6.8E+07 | 0.73021 | C | T | Phtr_g6597_SYNE1      | spectrin repeat containing, nuclear envelope 1 ( <i>SYNE1</i> )           | M |
| Scaffold61 | 6.8E+07 | 0.80172 | C | G | Phtr_g9642_CCDC170    | coiled-coil domain containing 170 ( <i>CCDC170</i> )                      | M |
| Scaffold61 | 6.8E+07 | 0.77367 | C | A | Phtr_g15498_RMND1     | required for meiotic nuclear division 1 homolog ( <i>RMND1</i> )          | M |
| Scaffold61 | 6.8E+07 | 0.80087 | C | T | Phtr_g6894_AKAP12     | A-kinase anchoring protein 12 ( <i>AKA12</i> )                            | M |
| Scaffold61 | 6.8E+07 | 0.8009  | C | T | Phtr_g6894_AKAP12     | A-kinase anchoring protein 12 ( <i>AKA12</i> )                            | M |
| Scaffold61 | 6.8E+07 | 0.81043 | G | A | Phtr_g6894_AKAP12     | A-kinase anchoring protein 12 ( <i>AKA12</i> )                            | M |
| Scaffold61 | 6.9E+07 | 0.7991  | A | G | Phtr_g16712_LRP11     | LDL receptor related protein 11 ( <i>LRP11</i> )                          | M |
| Scaffold0  | 331489  | 1       | G | T | Phtr_g7229_OLFML1     | olfactomedin like 1 ( <i>OLFML1</i> )                                     | M |
| Scaffold0  | 335280  | 0.91707 | A | G | Phtr_g7229_OLFML1     | olfactomedin like 1 ( <i>OLFML1</i> )                                     | M |
| Scaffold0  | 428450  | 0.77858 | C | G | Phtr_g6995_SYT9       | synaptotagmin IX ( <i>SYT9</i> )                                          | M |
| Scaffold0  | 1056892 | 0.7305  | G | T | Phtr_g20606_KIAA1549L | KIAA1549 like ( <i>KIAA1549L</i> )                                        | M |
| Scaffold0  | 1173975 | 1       | G | T | Phtr_g17272_HIPK3     | homeodomain interacting protein kinase 3 ( <i>HIPK3</i> )                 | M |
| Scaffold0  | 1409563 | 0.78838 | C | G | Phtr_g19449_CCDC73    | coiled-coil domain containing 73 ( <i>CCDC73</i> )                        | M |
| Scaffold0  | 1433565 | 0.89983 | C | T | Phtr_g19449_CCDC73    | coiled-coil domain containing 73 ( <i>CCDC73</i> )                        | M |
| Scaffold0  | 3616657 | 0.94118 | T | C | Phtr_g23581_BBOX1     | gamma-butyrobetaine hydroxylase 1 ( <i>BBOX1</i> )                        | M |
| Scaffold0  | 3942434 | 1       | C | G | Phtr_g1219_CYB5R2     | cytochrome B5 Reductase 2 ( <i>CYB5R2</i> )                               | M |
| Scaffold0  | 3945258 | 0.94759 | C | G | Phtr_g13521_PPFIBP2   | PPFIA binding protein 2 ( <i>PPFIBP2</i> )                                | M |
| Scaffold0  | 4213014 | 0.93408 | G | T | Phtr_g14180_FADS1L2   | fatty acid desaturase 1-like 2 ( <i>FADS1L2</i> )                         | M |
| Scaffold0  | 4241037 | 0.82965 | A | G | Phtr_g8765_FADS1L     | fatty acid desaturase 1-like ( <i>FADS1L</i> )                            | M |
| Scaffold0  | 4244481 | 0.94429 | C | G | Phtr_g8765_FADS1L     | fatty acid desaturase 1-like ( <i>FADS1L</i> )                            | M |
| Scaffold0  | 4274248 | 1       | C | T | Phtr_g25604_FADS2     | fatty acid desaturase 2 ( <i>FADS2</i> )                                  | M |
| Scaffold0  | 4334858 | 0.88128 | C | T | Phtr_g5610_OR5V1-like | Olfactory receptor 5V1-like ( <i>OR5V1-like</i> )                         | M |
| Scaffold0  | 4352547 | 1       | A | C | Phtr_g468_MAS1-like   | MAS1 proto-oncogene, G protein-coupled receptor-like ( <i>MAS1-like</i> ) | M |



|           |         |   |   |   |                           |                                                           |   |
|-----------|---------|---|---|---|---------------------------|-----------------------------------------------------------|---|
| Scaffold0 | 4355728 | 1 | A | G | Phtr_g23010_MRGPRH-like   | MAS-related GPR, member H-like ( <i>MRGPRH-like</i> )     | M |
| Scaffold0 | 4359226 | 1 | C | A | Phtr_g16755_MRGPRH-like-2 | MAS-related GPR, member H-like-2 ( <i>MRGPRH-like-2</i> ) | M |
| Scaffold0 | 4359229 | 1 | T | C | Phtr_g16755_MRGPRH-like-2 | MAS-related GPR, member H-like-2 ( <i>MRGPRH-like-2</i> ) | M |
| Scaffold0 | 4359230 | 1 | C | A | Phtr_g16755_MRGPRH-like-2 | MAS-related GPR, member H-like-2 ( <i>MRGPRH-like-2</i> ) | M |
| Scaffold0 | 4359232 | 1 | G | A | Phtr_g16755_MRGPRH-like-2 | MAS-related GPR, member H-like-2 ( <i>MRGPRH-like-2</i> ) | M |
| Scaffold0 | 4359233 | 1 | G | C | Phtr_g16755_MRGPRH-like-2 | MAS-related GPR, member H-like-2 ( <i>MRGPRH-like-2</i> ) | M |

**Supplementary Table 10.** Comparison of genetic summary statistics (nucleotide diversity and Tajima's D) and demographic modelling parameter estimates when using the southern or northern assembly as reference. Genetic summary statistics are reported as means for non-overlapping 10 kb windows in each region and have been calculated for pure southern (N=10) and pure northern samples (N=7).

|                           | Southern assembly | Northern assembly |
|---------------------------|-------------------|-------------------|
| <b>Summary statistics</b> |                   |                   |
| <b>Chromosome 1</b>       |                   |                   |
| pi south                  | 0.006             | 0.006             |
| pi north                  | 0.008             | 0.008             |
| Tajima's D south          | -0.4              | -0.4              |
| Tajima's D north          | -0.9              | -0.9              |
| <b>Chromosome 3</b>       |                   |                   |
| pi south                  | 0.006             | 0.006             |
| pi north                  | 0.006             | 0.006             |
| Tajima's D south          | -0.6              | -0.6              |
| Tajima's D north          | -0.8              | -0.7              |
| <b>Chromosome 5</b>       |                   |                   |
| pi south                  | 0.006             | 0.006             |
| pi north                  | 0.007             | 0.007             |
| Tajima's D south          | -0.3              | -0.3              |
| Tajima's D north          | -0.9              | -0.8              |

|                              |           |           |
|------------------------------|-----------|-----------|
|                              |           |           |
| <b>Rest of genome</b>        |           |           |
| pi south                     | 0.006     | 0.006     |
| pi north                     | 0.006     | 0.006     |
| Tajima's D south             | -1.0      | -1.0      |
| Tajima's D north             | -1.0      | -0.9      |
|                              |           |           |
|                              |           |           |
| <b>Demographic modelling</b> |           |           |
|                              |           |           |
| <b>Chromosome 1</b>          |           |           |
| Ne_northern                  | 1 566 413 | 1 565 912 |
| Ne_southern                  | 592 968   | 585 295   |
| Ne_ancestral                 | 273 471   | 269 233   |
| split_years                  | 1 197 770 | 1 183 534 |
|                              |           |           |
| <b>Chromosome 3</b>          |           |           |
| Ne_northern                  | 665 708   | 666 873   |
| Ne_southern                  | 323 997   | 319 258   |
| Ne_ancestral                 | 176 903   | 177 353   |
| split_years                  | 1 302 349 | 1 275 961 |
| m_e                          | 6.53E-07  | 6.56E-07  |
|                              |           |           |
| <b>Chromosome 5</b>          |           |           |
| Ne_northern                  | 1 519 746 | 1 467 626 |
| Ne_southern                  | 703 791   | 690 884   |
| Ne_ancestral                 | 318 141   | 318 360   |
| split_years                  | 1 218 887 | 1 164 125 |
